# Supplementary material for: An extended set of yeast-based functional assays accurately identifies human disease mutations
Source: HighWire-hosted journal article supplement (doi:10.1101/gr.192526.115), 2016-03-14
Supplement: Supplemental_Materials.docx [file Supplemental_Materials.docx]

**Supplemental material for**

**An extended set of yeast-based functional assays accurately identifies human disease mutations**

Song Sun, Fan Yang, Guihong Tan, Michael Costanzo, Rose Oughtred, Jodi Hirschman, Chandra Theesfeld, Pritpal Bansal, Nidhi Sahni, Song Yi, Analyn Yu, Tanya Tyagi, Cathy Tie, David E. Hill, Marc Vidal, Brenda J. Andrews, Charles Boone, Kara Dolinski, Frederick P. Roth

**Supplemental Note**

**A search for human disease-associated genes that complement essential yeast orthologs.** To develop a platform of functional complementation assays, we first systematically tested the ability of ‘wild type’ human disease genes to rescue mutations in orthologous yeast genes. According to the Inparanoid eukaryotic ortholog database ([Ostlund et al. 2010](#_ENREF_3)), there were 4156 human genes with a yeast ortholog, of which 635 were disease-associated (see Methods) with an available clone in hORFeome 8.1 library ([Yang et al. 2011](#_ENREF_5)) (Supplemental Fig. S1A). Because mutations in yeast essential genes confer dramatic growth phenotypes that can be confidently scored, we focused initially on a subset of 139 human genes orthologous to 125 essential yeast genes for which a temperature-sensitive (ts) mutant strain was available ([Ben-Aroya et al. 2008](#_ENREF_1); [Li et al. 2011](#_ENREF_2)).

**Literature curation of complementation relationships between human and yeast**. To assess the state of current knowledge about complementation relationships involving human genes, we systematically curated the current relevant literature. Given that many human disease genes remain to be identified, and that both essential and non-essential genes may be useful in complementation testing, we considered all *S. cerevisiae* genes for which the human ortholog is annotated to be a disease gene (i.e., for which one or more disease-associated alleles are annotated in either the Human Gene Mutation Database (HGMD) or the Online Mendelian Inheritance in Man (OMIM) database). In total, we identified literature reports of 197 complementation human-yeast relationships corresponding to 164 human genes (of which 138 were currently annotated as human disease-associated) (Supplemental Table S2).

**Overlap of identified complementation relationships with previous literature.** Within the space of 139 orthologous pairs tested for complementation in this study, complementation was previously reported for fifteen pairs (Supplemental Fig. S2B; Supplemental Table S1; Supplemental Table S2). For three of these orthologous pairs, with hindsight we should not have expected to identify complementation in our assay, either because the complementing isoform was not present in the ORFeome clone library we used or because we did not express the gene with an appropriate subcellular targeting sequence. Of the twelve complementation relationships we might have expected to observe, we identified seven (58%). We may be able to adjust our procedure in the future to identify additional complementation relationships. Possible avenues of exploration include investigation of a wider range of expression levels, e.g., through use of different promoters or by increasing plasmid copy number. Different promoters might also allow cell-cycle-dependent expression where appropriate. The Gateway system requires att recombination sites in the expression vector, which adds amino acids at the C-terminus that may interfere with protein function. Such effects could be alleviated, for example, through the introduction of stop codons in Gateway Entry vectors. For most human genes, expression clones are typically only available for a single splice isoform. However, investigation of alternative isoforms may reveal additional complementation relationships. Alternative N-terminal fusion tags that provide alternative yeast subcellular localization of the human protein could also be investigated. Finally, yeast growth conditions or introduction of human chaperones and other co-factors may assist with proper folding and localization of human proteins. Of the 26 complementing pairs identified in this study, seven pairs have been previously reported and 19 pairs (73%) are novel (Supplemental Fig. S2B).

**Validation of identified complementation relationships.** Despite the observed complementation relationships, it is possible that yeast ts mutants have residual non-essential function (even at the non-permissive temperature) that cannot be complemented by the human gene. To assess this possibility and to further confirm the complementation relationships, we tested the ability of human genes to rescue yeast null (‘knockout’) mutants for 19 complementing pairs (the subset of 26 pairs for which a heterozygous null mutant of the yeast gene was available). Expression vectors carrying ‘wild type’ human genes and the control vector expressing the GFP gene were transformed into the corresponding haploid-convertible heterozygous diploid knockout mutants. For each haploid-convertible strain, sporulation was induced, and sporulation cultures were spotted onto haploid selection plates with or without selection for the yeast gene knockout locus. All 19 tested complementation relationships were recapitulated in the null background (Supplemental Fig. S4). Although four pairs showed only weak complementation of the corresponding null allele, these results were fully consistent with complementation tests in ts mutants, where only weak complementation was observed for the same set of four pairs (Supplemental Fig. S3). These results support the idea that the complemented ts mutants did not have substantial residual function under the non-permissive growth conditions we used.

**Features distinguishing complementing and non-complementing pairs.** To determine whether pairs that complement have characteristics that separate them from pairs that do not, we first examined sequence identity. Non-complementing pairs showed a median sequence identity of 29%, while complementing pairs had a significantly greater median sequence identity of 45% (P = 0.0006, Wilcoxon test) (Supplemental Fig. S2C). Although this may appear consistent with previous studies suggesting use of a 40% sequence identity threshold for functional conservation ([Tian and Skolnick 2003](#_ENREF_4)), we note that a substantial number of complementing pairs and non-complementing pairs are inconsistent with this threshold (Supplemental Fig. S2C), indicating that sequence identity is not a perfect predictor of functional substitution of human/yeast orthologs.

We next examined the fraction of all residues in the yeast gene that can be aligned to the corresponding human ortholog (Supplemental Fig. S2D). Although we found a positive correlation (Pearson correlation coefficient or PCC = 20%) between this fraction and the ability of the human gene to complement its yeast ortholog, this correlation was only statistically suggestive (P = 0.09, Wilcoxon test) but not significant.

We also investigated a relationship between complementation and domain composition. Given that domains are functional units in a protein, we examined whether domains in each yeast protein (defined by the PFAM A collection) were also found in the corresponding human ortholog. Indeed, for all the 26 identified complementing pairs, each identified domain in the yeast protein was fully ‘covered’ by the corresponding human protein. By contrast, only 95 of the 113 (84%) non-complementing pairs had all yeast domains covered by the human ortholog (P = 0.018, Fisher’s Exact test,) (Supplemental Fig. S2E). A similar result was obtained when domain definitions were derived from the more complete but less curated resource PFAM B (Supplemental Fig. S2F).

We performed parallel analyses to those described above for the 197 complementing and 29 non-complementing yeast-human orthologous pairs curated from the literature (Supplemental Table S2). None of the three features examined above (sequence identity, fraction of aligned yeast residues and domain composition) showed significant difference between literature-curated complementing and non-complementing pairs (Supplemental Fig. S2G-I). Absence of significant differences in these features may be explained by investigational bias in literature curated yeast-human orthologous pairs, such that human-yeast pairs with high sequence similarity are preferentially tested for complementation.

**Selection of disease- and non-disease-associated mutations.**

We selected 120 disease-associated mutations from HGMD Professional 2013.4. These encompassed all known disease-associated mutations for 21 genes. For the PKLR gene for which 160 mutations were known, we randomly chose 23 of these (this number was chosen somewhat arbitrarily to match that of UROS, the gene with the next-greatest number of available disease mutations). We attempted construction and sequence-confirmation of all 120 alleles within expression clones, and successfully cloned and confirmed 101 disease-associated variants. We also selected 92 non-disease-associated mutations from the list of validated dbSNP variants, attempting to match the numbers of disease mutations for each gene (matching was not possible for some genes, given the limited number of validated non-disease variants). Although common missense variants are more likely to be functionally neutral, exclusive use of common variants would make the problem of pathogenicity prediction artificially easier than the real-world challenge: Real patients have both rare and common variants. Also, for common variants there is an alternative way to assess pathogenicity via association studies which is not available for individual rare variants, making rare variants an ‘orphan’ class of human variation that is in need of further attention. Of these 92, we generated expression clones for 78 non-disease mutations (Supplemental Table S3). We note that the distribution of allele frequencies of our non-disease set is not dramatically different from those of our disease set: Only 2 of the 78 non-disease mutations we constructed were common (minor allele frequency ≥ 1%), as compared with 2 common alleles among the 101 successfully constructed disease-associated variants.

**The odds form of Bayes’ Rule.**

Bayes’ Theorem can be written as P(D|A) = [P(A|D) × P(D)] / P(A) (Equation 1) or P(not D|A) = [P(A| not D) × P(not D)] / P(A) (Equation 2) where: (i) “D” indicates that variant is disease-causing, 2) “not D” indicates that variant is neutral and 3) A indicates that the functional complementation assay predicts a deleterious variant. Note that P(D|A) represents the *precision of the assay* or the *posterior probability* that the variant is disease-causing given a positive assay, and P(D) represents the *prior probability* that the variant is disease-causing before considering the assay result.

The Odds form of Bayes’ Rule helpfully eliminates the ‘nuisance parameter’ P(A), by dividing both sides of Equation 1 by the sides of Equation 2: O+ = L × O- (Equation 3), where 1) O+ represents the *posterior odds* P(D|A)/P(not D|A), 2) Lrepresentsthe *likelihood ratio* P(A|D)/P(A|not D), and 3) O- represents the *prior odds*  P(D)/P(not D). L does not depend on the prior probability, so for any given prior probability, the prior odds O- can be calculated and multiplied by L to obtain the posterior odds O+. O+ can be converted to precision (posterior probability) by: Precision = O+ / (1 + O+ ).

**References:**

Ben-Aroya S, Coombes C, Kwok T, O'Donnell KA, Boeke JD, Hieter P. 2008. Toward a comprehensive temperature-sensitive mutant repository of the essential genes of Saccharomyces cerevisiae. *Molecular cell* **30**(2): 248-258.

Li Z, Vizeacoumar FJ, Bahr S, Li J, Warringer J, Vizeacoumar FS, Min R, Vandersluis B, Bellay J, Devit M et al. 2011. Systematic exploration of essential yeast gene function with temperature-sensitive mutants. *Nature biotechnology* **29**(4): 361-367.

Ostlund G, Schmitt T, Forslund K, Kostler T, Messina DN, Roopra S, Frings O, Sonnhammer EL. 2010. InParanoid 7: new algorithms and tools for eukaryotic orthology analysis. *Nucleic acids research* **38**(Database issue): D196-203.

Tian W, Skolnick J. 2003. How well is enzyme function conserved as a function of pairwise sequence identity? *Journal of molecular biology* **333**(4): 863-882.

Yang X, Boehm JS, Yang X, Salehi-Ashtiani K, Hao T, Shen Y, Lubonja R, Thomas SR, Alkan O, Bhimdi T et al. 2011. A public genome-scale lentiviral expression library of human ORFs. *Nature methods* **8**(8): 659-661

**Supplemental Figure Legends**

**Supplemental Figure S1. Defining complementation test space and overview of complementation testing.** (A) The test space was defined by i) human-yeast orthology, ii) human disease association, (iii) availability of clones for human genes, (iv) essentiality and availability of temperature-sensitive mutants for yeast genes. (B) Overview of complementation testing.

**Supplemental Figure S2. Assessing complementation for 139 gene pairs involving a human disease gene and features distinguishing complementing and non-complementing pairs.** (A)Spotting assays assessing growth for three identified complementing pairs. The yeast cells were temperature-sensitive mutants expressing either the corresponding wild type human gene or a GFPgene as a control. Five-fold serial dilutions of yeast cells were spotted onto plates and incubated at 24ºC, 34ºC, 36ºC and 38ºC for 2 days. (B)These assays identified 19 novel complementation relationships, and confirmed 7 of 15 previously reported complementation relationships. (C-F)Feature analysis for the 139 orthologous pairs tested for complementation in this study (Supplemental Table S1):(C) Comparison of pairwise sequence identities between complementing and non-complementing pairs. Significance was assessed by [Wilcoxon signed-rank test](http://en.wikipedia.org/wiki/Wilcoxon_signed-rank_test).(D)Comparison of the fraction of all residues that can be aligned to the corresponding human ortholog between complementing and non-complementing pairs. Significance was assessed by [Wilcoxon signed-rank test](http://en.wikipedia.org/wiki/Wilcoxon_signed-rank_test). (E) Fractions of complementing and non-complementing yeast-human orthologous pairs for which all domains in yeast genes (defined by the PFAM A collection) are found in the corresponding human ortholog. Significance was assessed by Fisher’s Exact test. (F) Fractions of complementing and non-complementing orthologous pairs for which all domains in yeast genes (defined by the PFAM B collection) are found in the corresponding human ortholog. Significance was assessed by Fisher’s Exact test. (G-I) Feature analysis for the literature curated 197 complementing and 29 non-complementing pairs (Supplemental Table S2). (G) Comparison of pairwise sequence identities between complementing and non-complementing pairs. Significance was assessed by [Wilcoxon signed-rank test](http://en.wikipedia.org/wiki/Wilcoxon_signed-rank_test). (H) Comparison of the fraction of all residues that can be aligned to the corresponding human ortholog between complementing and non-complementing pairs. Significance was assessed by [Wilcoxon signed-rank test](http://en.wikipedia.org/wiki/Wilcoxon_signed-rank_test). (I) Fractions of complementing and non-complementing yeast-human orthologous pairs for which all domains in yeast genes (defined by the PFAM A collection) are found in the corresponding human ortholog. Significance was assessed by Fisher’s Exact test.

**Supplemental Figure S3. Spotting growth assays for the 26 identified complementing pairs.** The yeast cells were temperature-sensitive mutants expressing wild type alleles of human genes or the GFPgene as a control. Five-fold serial dilution of yeast cells were spotted onto plates and incubated at 24ºC, 34ºC, 36ºC and 38ºC for 2 days.

**Supplemental Figure S4. Spotting growth assays for 19 complementing pairs.** The yeast cells were haploid-convertible heterozygous diploid knockout mutants expressing wild type alleles of human genes or the GFP gene as a control. Five-fold serial dilution of sporulation cultures were spotted on haploid selection plates with or without selection for the gene knockout and incubated at 30ºC for 2 days.

**Supplemental Figure S5. Spotting growth assays for 179 missense variants from 22 disease-associated genes.** The yeast cells were temperature-sensitive mutants expressing wild type or mutant alleles of the human genes or the GFPgene as a control. Five-fold serial dilution of yeast cells were spotted onto plates and incubated at 24ºC, 36ºC and 38ºC for 2 days.

**Supplemental Figure S6. Relative growth rates of humanized yeast ts mutants expressing mutant alleles compared to the wild type allele.** (A)Variants from all genes except the UROS gene.(B)Variants from the UROS gene.

**Supplemental Figure S7. Correlation between replicate measures of functional assays.** (A)FCS score.TheUROS variants were excluded from the correlation analysis for FCS score.To avoid overplotting, noise (amount = 0.03) was added to the data by using R function jitter.(B)Relative growth rate.The UROS and PKLR variants were excluded from the correlation analysis for the relative growth rate.

**Supplemental Figure S8. Correlation between functional assays scores and/or PolyPhen2 score.** (A) Correlation between functional complementation spotting (FCS) and functional complementation Tecan growth curve (FCT) scores for tested mutations. (B) Correlation between FCS and PolyPhen2. (C) Correlation between FCT and PolyPhen2. To visualize density where many data points coincide, 3% error in plot position was randomly added via the R function jitter.

**Supplemental Figure S9. Precision and recall analysis for functional scores** (A)FCS, FCT.(B)FCS,PolyPhen2, SIFT, PROVEAN and CADD.(C)FCS, PolyPhen2, min, max, mean.(D)FCS, PolyPhen2, w1, w2, w3, w4.The UROS and PKLR variants were excluded from the precision and recall analysis for (A). The UROS variants were excluded from the precision and recall analysis for (B-D). (E)FCS, PolyPhen2. (F)FCS,PolyPhen2, SIFT, PROVEAN and CADD.

**Supplemental Figure S10. Distribution of functional scores for disease- and non-disease-associated UROS mutations.** (A)FCS score.(B)FCT score.

**Supplemental Figure S11. Precision and recall analysis for the original and new reference sets with various restriction and filtering applied** (A)Original reference set.(B)Disease set restricted to HGMD DM class.(C)Disease set restricted to the intersection between HGMD DM and ClinVar pathogenic.(D)Disease set restricted to mutations found only in HGMD DM set. (E-H) All variants filtered by different ExAC allele frequencies while disease set restricted to the intersection between HGMD DM and ClinVar pathogenic. (E) ExAC, variants whose MAF information is available in ExAC. (F) ExAC1e-5, variants whose MAF is less than 0.00001. (G) ExAC1e-4, variants whose MAF is less than 0.0001. (H) ExAC1e-3, variants whose MAF is less than 0.001.

**Supplemental Figure S12. Prediction performance for 10000 simulated reference sets with 27% of the positive reference set randomly selected from the negative reference set.** The ratio of AUPRC to the prior probability is designated as ‘AUPRC_norm’. The AUPRC_norm for the original reference set is shown in red dots.
