# Supplementary material for: An extended set of yeast-based functional assays accurately identifies human disease mutations
Source: HighWire-hosted journal article supplement (doi:10.1101/gr.192526.115), 2016-03-14
Supplement: Supplemental_TableS1-6.docx [file Supplemental_TableS1-6.docx]

**Supplemental Table S1. 139 orthologous pairs and complementation results.**

| Human Gene  Symbol | Human  GeneID | hORF  position | yeastORF | ts strain ID | ts allele (*ts mutants were generated in this study) | was complementation detected in this study (yes or no) | was complementation previously reported (yes or no) | comments | associated diseases |
| --- | --- | --- | --- | --- | --- | --- | --- | --- | --- |
| EMG1 | 10436 | 81040@F04 | YLR186W | TSA1056/TSA1141 | emg1-1/emg1-ph | yes | yes |  | bowen-conradi syndrome |
| YARS | 8565 | 81096@H06 | YGR185C | TSA290 | tys1-1 | yes | yes |  | charcot-marie-tooth disease |
| PIN1 | 5300 | 81024@E09 | YJR017C | TSA698 | ess1-h164r | yes | yes |  | lung cancer, decreased risk, association with|hypogonadotropic hypogonadism, idiopathic|esophageal carcinoma, decreased risk, association with|decreased risk of squamous cell carcinoma, association with|breast cancer, decreased risk, association with|alzheimer disease, delayed onset, association with|alzheimer disease, association with|alzheimer disease |
| DHDDS | 79947 | 81063@D07 | YBR002C | NA | rer2-500* | yes | yes |  | retinitis pigmentosa |
| NCS1 | 23413 | 81028@H08 | YDR373W | TSA399 | frq1-1 | yes | yes |  | autism, associated with |
| NHP2 | 55651 | 81023@F06 | YDL208W | TSA1176 | nhp2-ph | yes | yes |  | dyskeratosis congenita |
| UBE2I | 7329 | 81013@B03 | YDL064W | TSA370 | ubc9-2 | yes | yes |  | breast cancer |
| PKLR | 5313 | 81099@D02 | YAL038W | TSA34 | cdc19-1 | yes | no |  | pyruvate kinase deficiency |
| UROS | 7390 | 81043@E07 | YOR278W | NA | hem4-500* | yes | no |  | porphyria, congenital erythropoietic |
| PGK1 | 5230 | 81077@D12 | YCR012W | NA | pgk1-500* | yes | no |  | phosphoglycerate kinase deficiency |
| GLUL | 2752 | 81067@G02 | YPR035W | tsq2428 | gln1-2* | yes | no |  | glutamine deficiency, congenital |
| NSDHL | 50814 | 81072@E05 | YGL001C | TSA742 | erg26-1 | yes | no |  | potential protein deficiency|ck syndrome|child syndrome, association with|child syndrome |
| DPAGT1 | 1798 | 81076@E09 | YBR243C | NA | alg7-500* | yes | no |  | myasthenic syndrome, congenital.|limb-girdle congenital myasthenic syndrome with tubular aggregates|congenital disorder of glycosylation 1j|congenital disorder of glycosylation 1 |congenital disorder of glycosylation |
| GDI1 | 2664 | 81084@H06 | YER136W | TSA64 | gdi1-1 | yes | no |  | mental retardation, non-specific, x-linked |
| FDFT1 | 2222 | 81077@A01 | YHR190W | TSA1128 | erg9-ph | yes | no |  | increased total cholesterol |
| CMPK1 | 51727 | 81037@E04 | YKL024C | TSA1034 | ura6-6 | yes | no |  | prolonged respiratory infection in children |
| GFPT2 | 9945 | 81110@D04 | YKL104C | TSA989 | gfa1-97 | yes | no |  | contribute to type ii diabetes mellitus |
| RPIA | 22934 | 81038@G02 | YOR095C | tsq2310 | rki1-1* | yes | no |  | ribose 5-phosphate isomerase deficiency |
| CALM1 | 801 | 81012@B09 | YBR109C | TSA154 | cmd1-1 | yes | no |  | ventricular fibrillation, idiopathic|osteoarthritis, association with|catecholaminergic polymorphic ventricular tachycardia|cardiac arrest |
| DHFR | 1719 | 81028@C01 | YOR236W | TSA884 | dfr1-td | yes | no |  | spina bifida, risk, association with|retinoblastoma, in children of maternal homozygotes, association with.|megaloblastic anaemia and/or pancytopenia|megaloblastic anaemia & cerebral folate deficiency|increased expression|autism, association with|amyotrophic lateral sclerosis, association with|altered folic acid metabolism |
| TBP | 6908 | 81059@D06 | YER148W | TSA476 | spt15-p65s | yes | no |  | schizophrenia, association with |parkinson disease |multiple system atrophy |huntington disease-like |creutzfeldt-jakob disease, variant|cognitive decline, progressive, and subtle cerebellar symptoms.|camptocormia|behavioral disorder, dementia, ataxia, and rigidity|ataxia, cognitive impairment and seizures|ataxia |
| SUMO1 | 7341 | 81006@D07 | YDR510W | TSA928 | smt3-331 | yes | no |  | cleft lip with or without cleft palate |
| TPK1 | 27010 | 81046@D11 | YOR143C | TSA1173 | thi80-ph | yes | no |  | thiamine pyrophosphokinase deficiency syndrome 5 |
| TECR | 9524 | 81053@A05 | YDL015C | TSA1113 | tsc13-ph | yes | no |  | nonsyndromic mental retardation |
| CALM3 | 808 | 81012@H09 | YBR109C | TSA154 | cmd1-1 | yes | no |  | cardiomyopathy, hypertrophic, modifier of, association with |
| PSMD7 | 5713 | 81061@E08 | YOR261C | NA | rpn8-500* | yes | no |  | ankylosing spondylitis, association with |
| RFT1 | 91869 | 81009@B09 | YBL020W | NA | rft1-503* | no | yes | different isoform was used in complementation test |  |
| GFER | 2671 | 81032@E11 | YGR029W | NA | erv1-503* | no | yes | mitochondrial targeting sequence missing, protein not expressed and located in the correct subcellular compartment |  |
| NDOR1 | 27158 | 81090@A03 | YPR048W | tsq2435 | tah18-1* | no | yes |  |  |
| PRKCH | 5583 | 81001@E07 | YBL105C | TSA535 | pkc1-ts | no | yes | different isoform was used in complementation test |  |
| PIGV | 55650 | 81088@G07 | YBR004C | TSA1243 | ybr004c-ph | no | yes |  |  |
| PYCR1 | 5831 | 81060@H11 | YER023W | TSA1082 | pro3-ph | no | yes |  |  |
| EIF4E | 1977 | 81035@D09 | YOL139C | TSA306 | cdc33-e72g | no | yes |  |  |
| LARS | 51520 | 81131@D09 | YPL160W | TSA922 | cdc60-ts | no | yes |  |  |
| ADSL | 158 | 81136@B02 | YLR359W | NA | ade13-502* | no | no |  |  |
| HMBS | 3145 | 81067@A01 | YDL205C | NA | hem3-503* | no | no |  |  |
| MVK | 4598 | 81075@C06 | YMR208W | tsq2204 | erg12-200* | no | no |  |  |
| MYH9 | 4627 | 81011@F09 | YHR023W | NA | myo1-505* | no | no |  |  |
| TIMM44 | 10469 | 81085@B04 | YIL022W | TSA956 | tim44-8 | no | no |  |  |
| ACTC1 | 70 | 81072@A04 | YFL039C | TSA72 | act1-124 | no | no |  |  |
| ALAS2 | 212 | 81104@A08 | YDR232W | tsq1764 | hem1-200* | no | no |  |  |
| CSNK1D | 1453 | 81077@E03 | YPL204W | TSA1196 | hrr25-ph | no | no |  |  |
| ACAT1 | 38 | 81024@B07 | YPL028W | TSA531 | erg10-1 | no | no |  |  |
| ACTA2 | 59 | 81072@B04 | YFL039C | TSA72 | act1-124 | no | no |  |  |
| CPOX | 1371 | 81121@E03 | YDR044W | TSA1076 | hem13-ph | no | no |  |  |
| GARS | 2617 | 81111@A04 | YBR121C | TSA1071 | grs1-ph | no | no |  |  |
| PGAM2 | 5224 | 81041@H08 | YKL152C | NA | gpm1-500* | no | no |  |  |
| SPTLC1 | 10558 | 81136@A07 | YMR296C | TSA600 | lcb1-5 | no | no |  |  |
| TPI1 | 7167 | 81040@D03 | YDR050C | TSA988 | tpi1-1670 | no | no |  |  |
| EIF2B2 | 8892 | 81065@B12 | YLR291C | TSA1149 | gcd7-ph | no | no |  |  |
| PANK2 | 80025 | 81011@A05 | YDR531W | TSA1225 | cab1-ph | no | no |  |  |
| VCP | 7415 | 81100@C08 | YDL126C | TSA179 | cdc48-9 | no | no |  |  |
| HMGCS2 | 3158 | 81125@H10 | YML126C | TSA1104 | erg13-ph | no | no |  |  |
| MPI | 4351 | 81080@H03 | YER003C | TSA1081 | pmi40-ph | no | no |  |  |
| SBDS | 51119 | 81046@A12 | YLR022C | TSA1026 | sdo1-vma1-ts | no | no |  |  |
| TUBA1A | 7846 | 81084@F06 | YML085C | tsq2162 | tub1-201* | no | no |  |  |
| UROD | 7389 | 81071@A03 | YDR047W | NA | hem12-509* | no | no |  |  |
| BPGM | 669 | 81042@H04 | YKL152C | NA | gpm1-500* | no | no |  |  |
| EIF2B4 | 8890 | 81089@C02 | YGR083C | tsq1936 | gcd2-202* | no | no |  |  |
| FECH | 2235 | 81123@E08 | YOR176W | tsq2339 | hem15-204* | no | no |  |  |
| HLCS | 3141 | 81111@F07 | YDL141W | tsq1739 | bpl1-202 | no | no |  |  |
| SDHC | 6391 | 81025@B05 | YKL141W | NA | sdh3-501* | no | no |  |  |
| TSEN2 | 80746 | 81086@D05 | YLR105C | TSA676 | sen2-1 | no | no |  |  |
| STXBP1 | 6812 | 81106@E12 | YDR164C | TSA36 | sec1-1 | no | no |  |  |
| PRPF3 | 9129 | 81014@E10 | YDR473C | TSA58 | prp3-1 | no | no |  |  |
| HSPD1 | 3329 | 81105@D07 | YLR259C | tsq2106 | hsp60-200* | no | no |  |  |
| PRPF31 | 26121 | 81094@D10 | YGR091W | TSA400/TSA472 | prp31-ts/prp31-1 | no | no |  |  |
| SMARCA2 | 6595 | 81102@F09 | YIL126W | TSA507 | sth1-2 | no | no |  |  |
| DPM1 | 8813 | 81042@H06 | YPR183W | TSA330 | dpm1-6 | no | no |  |  |
| ELAC2 | 60528 | 81017@E06 | YKR079C | NA | trz1-503* | no | no |  |  |
| GLE1 | 2733 | 81111@E09 | YDL207W | TSA919 | gle1-2 | no | no |  |  |
| POLD1 | 5424 | 81138@F02 | YDL102W | TSA17 | cdc2-7 | no | no |  |  |
| SEC63 | 11231 | 81111@A11 | YOR254C | TSA231 | sec63-1 | no | no |  |  |
| TAF7L | 54457 | 81124@B04 | YMR227C | TSA638 | taf7-ts1 | no | no |  |  |
| PSMB9 | 5698 | 81091@B07 | YJL001W | TSA292 | pre3-2 | no | no |  |  |
| ACTB | 60 | 81072@D10 | YFL039C | TSA72 | act1-124 | no | no |  |  |
| TUBB2B | 347733 | 81079@D01 | YFL037W | tsq1492 | tub2-430 | no | no |  |  |
| PYCRL | 65263 | 81048@G05 | YER023W | TSA1082 | pro3-ph | no | no |  |  |
| ALG2 | 85365 | 81040@D07 | YGL065C | TSA461 | alg2-1 | no | no |  |  |
| CSNK1E | 1454 | 81077@H06 | YPL204W | TSA1196 | hrr25-ph | no | no |  |  |
| RBM28 | 55131 | 81016@E11 | YPL043W | TSA660 | nop4-3 | no | no |  |  |
| PSMB8 | 5696 | 81118@F02 | YPR103W | TSA916 | pre2-127 | no | no |  |  |
| CCT5 | 22948 | 81097@B09 | YJR064W | TSA1254 | yjr064w-ph | no | no |  |  |
| PIP4K2A | 5305 | 81076@G09 | YDR208W | TSA129/TSA903 | mss4-103/mss4-102 | no | no |  |  |
| RPL5 | 6125 | 81006@F04 | YPL131W | tsq2383 | rpl5-1 | no | no |  |  |
| RPA4 | 29935 | 81042@F12 | YNL312W | TSA1180 | rfa2-ph | no | no |  |  |
| CIRH1A | 84916 | 81110@D03 | YDR324C | tsq1773 | utp4-1 | no | no |  |  |
| TUBB1 | 81027 | 81084@E03 | YFL037W | tsq1492 | tub2-430 | no | no |  |  |
| PIGM | 93183 | 81082@E06 | YJR013W | NA | gpi14-505* | no | no |  |  |
| RARS2 | 57038 | 81070@H09 | YDR341C | TSA1118 | ydr341c-ph | no | no |  |  |
| SLC7A1 | 6541 | 81108@A07 | YGR191W | tsq1955 | hip1-200* | no | no |  |  |
| AURKC | 6795 | 81117@A11 | YPL209C | TSA165 | ipl1-1 | no | no |  |  |
| COG4 | 25839 | 81097@G08 | YPR105C | tsq2442 | cog4-200* | no | no |  |  |
| HARS2 | 23438 | 81094@F08 | YPR033C | TSA945 | hts1-1 | no | no |  |  |
| HSPA9 | 3313 | 81110@D07 | YJR045C | TSA328 | ssc1-2 | no | no |  |  |
| KARS | 3735 | 81106@A04 | YDR037W | tsq1746 | krs1-1* | no | no |  |  |
| MCM5 | 4174 | 81015@E03 | YLR274W | TSA403 | cdc46-1 | no | no |  |  |
| ORC4 | 5000 | 81040@B03 | YPR162C | TSA1247 | ypr162c-ph | no | no |  |  |
| PIGN | 23556 | 81019@G07 | YKL165C | NA | mcd4-500* | no | no |  |  |
| POLR1C | 9533 | 81064@A02 | YPR110C | TSA642 | rpc40-v78r | no | no |  |  |
| PRPF6 | 24148 | 81127@E10 | YBR055C | TSA367/TSA455 | prp6-ts/prp6-1 | no | no |  |  |
| RPS27A | 6233 | 81023@G08 | YLR167W | NA | rps31-501* | no | no |  |  |
| SEC23B | 10483 | 81016@D08 | YPR181C | TSA900 | sec23-1 | no | no |  |  |
| RPL35A | 6165 | 81044@A01 | YPL143W | NA | rpl33a-502* | no | no |  |  |
| PIGA | 5277 | 81088@H05 | YPL175W | TSA474 | spt14-1-10c | no | no |  |  |
| PLCG2 | 5336 | 81020@C07 | YPL268W | NA | plc1-500* | no | no |  |  |
| DDOST | 1650 | 81085@B06 | YEL002C | TSA581 | wbp1-2 | no | no |  |  |
| TUBB3 | 10381 | 81084@H10 | YFL037W | tsq1492 | tub2-430 | no | no |  |  |
| SPTLC2 | 9517 | 81099@H05 | YDR062W | TSA575/TSA585 | lcb2-2/lcb2-16 | no | no |  |  |
| RAD21 | 5885 | 81108@A02 | YDL003W | TSA70/TSA1229 | mcd1-73/ydl003w-ph | no | no |  |  |
| NOP56 | 10528 | 81026@B08 | YLR197W | TSA1140 | nop56-ph | no | no |  |  |
| CDK7 | 1022 | 81064@F10 | YDL108W | TSA109 | kin28-ts | no | no |  |  |
| CSTF2T | 23283 | 81107@D10 | YGL044C | TSA652 | rna15-58 | no | no |  |  |
| DHX37 | 57647 | 81001@D08 | YMR128W | tsq2182 | ecm16-2 | no | no |  |  |
| EEF1B2 | 1933 | 81036@H10 | YAL003W | TSA987 | efb1-4 | no | no |  |  |
| EPC2 | 26122 | 81130@E02 | YFL024C | NA | epl1-508* | no | no |  |  |
| EXOC8 | 149371 | 81014@F10 | YBR102C | TSA24 | exo84-102 | no | no |  |  |
| FBXW7 | 55294 | 81014@A04 | YIL046W | TSA947 | met30-9 | no | no |  |  |
| GSPT1 | 2935 | 81137@B12 | YDR172W | TSA28 | sup35-td | no | no |  |  |
| IQGAP3 | 128239 | 81021@B02 | YPL242C | NA | iqg1-500* | no | no |  |  |
| KPNA1 | 3836 | 81097@C10 | YNL189W | TSA1182 | srp1-ph | no | no |  |  |
| MAGEE2 | 139599 | 81126@D02 | YDR288W | TSA994 | nse3-ts3 | no | no |  |  |
| NXF3 | 56000 | 81097@F04 | YPL169C | TSA816 | mex67-ts5 | no | no |  |  |
| NXF5 | 55998 | 81071@F11 | YPL169C | TSA816 | mex67-ts5 | no | no |  |  |
| PIGO | 84720 | 81085@D07 | YLL031C | TSA959 | gpi13-4 | no | no |  |  |
| PLCD4 | 84812 | 81016@F11 | YPL268W | NA | plc1-500* | no | no |  |  |
| POLE2 | 5427 | 81096@A08 | YPR175W | NA | dpb2-504* | no | no |  |  |
| POLR2A | 5430 | 81099@H09 | YDL140C | TSA804 | rpo21-1 | no | no |  |  |
| POLR2E | 5434 | 81030@D10 | YBR154C | TSA1110 | rpb5-ph | no | no |  |  |
| PRKCB | 5579 | 81110@A09 | YBL105C | TSA535 | pkc1-ts | no | no |  |  |
| PRPF39 | 55015 | 81108@E08 | YDR235W | TSA1085 | prp42-ph | no | no |  |  |
| RNF113A | 7737 | 81064@A07 | YLR323C | tsq2114 | cwc24-1* | no | no |  |  |
| RPA2 | 6118 | 81043@C07 | YNL312W | TSA1180 | rfa2-ph | no | no |  |  |
| RPS3 | 6188 | 81039@G09 | YNL178W | NA | rps31-501* | no | no |  |  |
| SLC7A2 | 6542 | 81109@C11 | YGR191W | tsq1955 | hip1-200* | no | no |  |  |
| SMC1B | 27127 | 81020@F08 | YFL008W | TSA68/TSA321 | smc1-259/smc1-2 | no | no |  |  |
| STXBP3 | 6814 | 81100@A03 | YDR164C | TSA36 | sec1-1 | no | no |  |  |
| UFD1L | 7353 | 81053@D05 | YGR048W | TSA677 | ufd1-2 | no | no |  |  |
| ZC3H14 | 79882 | 81053@H05 | YGL122C | NA | nab2-500* | no | no |  |  |

**Supplemental Table S2. Literature curation.**

| Human NCBI GeneID in PMID | Human UniProt ID | Yeast UniProt ID | ORF | Gene | Requirement in yeast (E/NE) | PMID | OrthoTested (NCBI gene symbol) | OrthoTested-Organism | Test-Organism | Was ComplementationDemonstrated (yes, no, no expt) |
| --- | --- | --- | --- | --- | --- | --- | --- | --- | --- | --- |
| 48 | P21399 | P19414 | YLR304C | ACO1 | NE | 15263083 | ACO1 | H. SAPIENS | S. CEREVISIAE | yes |
| 203 | P00568 | P07170 | YDR226W | ADK1 | NE | 18433446 | AK1 | H. SAPIENS | S. CEREVISIAE | yes |
| 6687 | Q9UQ90 | P39925 | YER017C | AFG3 | NE | 14623864 | SPG7 | H. SAPIENS | S. CEREVISIAE | yes |
| 10939 | Q9Y4W6 | P39925 | YER017C | AFG3 | NE | 14623864 | AFG3L2 | H. SAPIENS | S. CEREVISIAE | yes |
| 10939 | Q9Y4W6 | P39925 | YER017C | AFG3 | NE | 20208537 | AFG3L2 | H. SAPIENS | S. CEREVISIAE | yes |
| 189 | P21549 | P43567 | YFL030W | AGX1 | NE | 18782763 | AGXT | H. SAPIENS | S. CEREVISIAE | yes |
| 16 | P49588 | P40825 | YOR335C | ALA1 | E | 7761427 | AARS | H. SAPIENS | S. CEREVISIAE | yes |
| 217 | P05091 | P46367 | YOR374W | ALD4 | NE | 23454351 | ALDH2 | H. SAPIENS | S. CEREVISIAE | yes |
| 56052 | Q9BT22 | P16661 | YBR110W | ALG1 | E | 24157261 | ALG1 | H. SAPIENS | S. CEREVISIAE | yes |
| 79087 | Q9BV10 | P53730 | YNR030W | ALG12 | NE | 12217961 | ALG12 | H. SAPIENS | S. CEREVISIAE | yes |
| 79796 | Q9H6U8 | P53868 | YNL219C | ALG9 | NE | 15148656 | ALG9 | H. SAPIENS | S. CEREVISIAE | yes |
| 381 | P84085 | P11076 | YDL192W | ARF1 | NE | 1447192 | ARF5 | H. SAPIENS | S. CEREVISIAE | yes |
| 382 | P62330 | P11076 | YDL192W | ARF1 | NE | 1447192 | ARF6 | H. SAPIENS | S. CEREVISIAE | yes |
| 375 | P84077 | P11076 | YDL192W | ARF1 | NE | 1899243 | ARF1 | H. SAPIENS | S. CEREVISIAE | yes |
| 378 | P18085 | P11076 | YDL192W | ARF1 | NE | 1899243 | ARF4 | H. SAPIENS | S. CEREVISIAE | yes |
| 381 | P84085 | P19146 | YDL137W | ARF2 | NE | 1447192 | ARF5 | H. SAPIENS | S. CEREVISIAE | yes |
| 382 | P62330 | P19146 | YDL137W | ARF2 | NE | 1447192 | ARF6 | H. SAPIENS | S. CEREVISIAE | yes |
| 375 | P84077 | P19146 | YDL137W | ARF2 | NE | 1899243 | ARF1 | H. SAPIENS | S. CEREVISIAE | yes |
| 378 | P18085 | P19146 | YDL137W | ARF2 | NE | 1899243 | ARF4 | H. SAPIENS | S. CEREVISIAE | yes |
| 91647 | Q8N5M1 | P22135 | YJL180C | ATP12 | NE | 19933271 | ATPAF2 | H. SAPIENS | S. CEREVISIAE | yes |
| 617 | Q9Y276 | P32839 | YDR375C | BCS1 | NE | 20472482 | BCS1L | H. SAPIENS | S. CEREVISIAE | yes |
| 7531 | P62258 | P29311 | YER177W | BMH1 | NE | 17430600 | YWHAE | H. SAPIENS | S. CEREVISIAE | yes |
| 7531 | P62258 | P34730 | YDR099W | BMH2 | NE | 17430600 | YWHAE | H. SAPIENS | S. CEREVISIAE | yes |
| 112858 | Q96S44 | P53323 | YGR262C | BUD32 | NE | 12914926 | TP53RK | H. SAPIENS | S. CEREVISIAE | yes |
| 4942 | P04181 | P07991 | YLR438W | CAR2 | NE | 23076989 | OAT | H. SAPIENS | S. CEREVISIAE | yes |
| 540 | P35670 | P38995 | YDR270W | CCC2 | NE | 9261163 | ATP7B | H. SAPIENS | S. CEREVISIAE | yes |
| 538 | Q04656 | P38995 | YDR270W | CCC2 | NE | 9452509 | ATP7A | H. SAPIENS | S. CEREVISIAE | yes |
| 540 | P35670 | P38995 | YDR270W | CCC2 | NE | 9654149 | ATP7B | H. SAPIENS | S. CEREVISIAE | yes |
| 538 | Q04656 | P38995 | YDR270W | CCC2 | NE | 12572677 | ATP7A | H. SAPIENS | S. CEREVISIAE | yes |
| 540 | P35670 | P38995 | YDR270W | CCC2 | NE | 14962673 | ATP7B | H. SAPIENS | S. CEREVISIAE | yes |
| 540 | P35670 | P38995 | YDR270W | CCC2 | NE | 15963506 | ATP7B | H. SAPIENS | S. CEREVISIAE | yes |
| 989 | Q16181 | P25342 | YCR002C | CDC10 | NE | 24055994 | 07-Sep | H. SAPIENS | S. CEREVISIAE | yes |
| 1977 | P06730 | P07260 | YOL139C | CDC33 | E | 11606200 | EIF4E | H. SAPIENS | S. CEREVISIAE | yes |
| 51520 | Q9P2J5 | P26637 | YPL160W | CDC60 | E | 18550527 | LARS | H. SAPIENS | S. CEREVISIAE | yes |
| 9391 | O76071 | Q05583 | YDR267C | CIA1 | E | 17937914 | CIAO1 | H. SAPIENS | S. CEREVISIAE | yes |
| 27235 | Q96H96 | P32378 | YNR041C | COQ2 | NE | 15153069 | COQ2 | H. SAPIENS | S. CEREVISIAE | yes |
| 27235 | Q96H96 | P32378 | YNR041C | COQ2 | NE | 17332895 | COQ2 | H. SAPIENS | S. CEREVISIAE | yes |
| 27235 | Q96H96 | P32378 | YNR041C | COQ2 | NE | 17332895 | COQ2 | H. SAPIENS | S. CEREVISIAE | yes |
| 51117 | Q9Y3A0 | O13525 | YDR204W | COQ4 | NE | 18474229 | COQ4 | H. SAPIENS | S. CEREVISIAE | yes |
| 51004 | Q9Y2Z9 | P53318 | YGR255C | COQ6 | E | 24140869 | COQ6 | H. SAPIENS | S. CEREVISIAE | yes |
| 56997 | Q8NI60 | P27697 | YGL119W | COQ8 | NE | 21296186 | ADCK3 | H. SAPIENS | S. CEREVISIAE | yes |
| 1352 | Q12887 | P21592 | YPL172C | COX10 | NE | 8078902 | COX10 | H. SAPIENS | S. CEREVISIAE | yes |
| 788 | O43772 | Q12289 | YOR100C | CRC1 | NE | 11162577 | SLC25A20 | H. SAPIENS | S. CEREVISIAE | yes |
| 54205 | P99999 | P00044 | YJR048W | CYC1 | NE | 23910460 | CYC1 | H. SAPIENS | S. CEREVISIAE | yes |
| 3052 | P53701 | P06182 | YAL039C | CYC3 | NE | 11827457 | HCCS | H. SAPIENS | S. CEREVISIAE | yes |
| 3052 | P53701 | P06182 | YAL039C | CYC3 | NE | 14514677 | CCHL | H. SAPIENS | S. CEREVISIAE | yes |
| 3052 | P53701 | P06182 | YAL039C | CYC3 | NE | 17033964 | HCCS | H. SAPIENS | S. CEREVISIAE | yes |
| 875 | P35520 | P32582 | YGR155W | CYS4 | NE | 8022826 | CBS | H. SAPIENS | S. CEREVISIAE | yes |
| 875 | P35520 | P32582 | YGR155W | CYS4 | NE | 8528202 | CBS | H. SAPIENS | S. CEREVISIAE | yes |
| 875 | P35520 | P32582 | YGR155W | CYS4 | NE | 8528202 | CBS | H. SAPIENS | S. CEREVISIAE | yes |
| 875 | P35520 | P32582 | YGR155W | CYS4 | NE | 22267502 | CBS | H. SAPIENS | S. CEREVISIAE | yes |
| 3052 | P53701 | Q00873 | YKL087C | CYT2 | NE | 14514677 | CCHL | H. SAPIENS | S. CEREVISIAE | yes |
| 1654 | O00571 | P06634 | YOR204W | DED1 | E | 10336476 | DDX3X | H. SAPIENS | S. CEREVISIAE | yes |
| 1654 | O00571 | P06634 | YOR204W | DED1 | E | 25013175 | DDX3X | H. SAPIENS | S. CEREVISIAE | yes |
| 79644 | Q9H8P0 | P40526 | YIL049W | DFG10 | NE | 20637498 | SRD5A3 | H. SAPIENS | S. CEREVISIAE | yes |
| 144245 | Q5I7T1 | P50076 | YGR227W | DIE2 | NE | 17189275 | ALG10B | H. SAPIENS | S. CEREVISIAE | yes |
| 55748 | Q96KP4 | P43616 | YFR044C | DUG1 | NE | 19346245 | CNDP2 | H. SAPIENS | S. CEREVISIAE | yes |
| 26610 | Q96EB1 | Q02884 | YPL101W | ELP4 | NE | 15473317 | ENSP00000265650|ENSP00000298937 | H. SAPIENS | S. CEREVISIAE | yes |
| 51234 | Q5J8M3 | P53073 | YGL231C | EMC4 | NE | 18586032 | EMC4 | H. SAPIENS | S. CEREVISIAE | yes |
| 10436 | Q92979 | Q06287 | YLR186W | EMG1 | E | 11935223 | EMG1 | H. SAPIENS | S. CEREVISIAE | yes |
| 10682 | Q15125 | P32352 | YMR202W | ERG2 | NE | 8798407 | EBP | H. SAPIENS | S. CEREVISIAE | yes |
| 6309 | O75845 | P32353 | YLR056W | ERG3 | NE | 10786622 | SC5D | H. SAPIENS | S. CEREVISIAE | yes |
| 1497 | O60931 | P17261 | YCR075C | ERS1 | NE | 15885099 | ENSP00000046640 | H. SAPIENS | S. CEREVISIAE | yes |
| 2671 | P55789 | P27882 | YGR029W | ERV1 | E | 23186364 | GFER | H. SAPIENS | S. CEREVISIAE | yes |
| 5300 | Q13526 | P22696 | YJR017C | ESS1 | E | 11118437 | PIN1 | H. SAPIENS | S. CEREVISIAE | yes |
| 9156 | Q9UQ84 | P39875 | YOR033C | EXO1 | NE | 10364235 | EXO1 | H. SAPIENS | S. CEREVISIAE | yes |
| 2180 | P33121 | P30624 | YOR317W | FAA1 | NE | 22633490 | ACSL1 | H. SAPIENS | S. CEREVISIAE | yes |
| 23205 | Q96GR2 | P30624 | YOR317W | FAA1 | NE | 24269233 | ACSBG1 | H. SAPIENS | S. CEREVISIAE | yes |
| 2181 | O95573 | P30624 | YOR317W | FAA1 | NE | 24269233 | ACSL3 | H. SAPIENS | S. CEREVISIAE | yes |
| 2182 | O60488 | P30624 | YOR317W | FAA1 | NE | 24269233 | ACSL4 | H. SAPIENS | S. CEREVISIAE | yes |
| 10999 | Q6P1M0 | P30624 | YOR317W | FAA1 | NE | 24269233 | SLC27A4|ACSVL4 | H. SAPIENS | S. CEREVISIAE | yes |
| 11001 | O14975 | P30624 | YOR317W | FAA1 | NE | 24269233 | SLC27A2|ACSLV1 | H. SAPIENS | S. CEREVISIAE | yes |
| 23305 | Q9UKU0 | P30624 | YOR317W | FAA1 | NE | 24269233 | ACSL6 | H. SAPIENS | S. CEREVISIAE | yes |
| 51703 | Q9ULC5 | P30624 | YOR317W | FAA1 | NE | 24269233 | ACSL5 | H. SAPIENS | S. CEREVISIAE | yes |
| 2180 | P33121 | P47912 | YMR246W | FAA4 | NE | 22633490 | ACSL1 | H. SAPIENS | S. CEREVISIAE | yes |
| 23205 | Q96GR2 | P47912 | YMR246W | FAA4 | NE | 24269233 | ACSBG1 | H. SAPIENS | S. CEREVISIAE | yes |
| 2181 | O95573 | P47912 | YMR246W | FAA4 | NE | 24269233 | ACSL3 | H. SAPIENS | S. CEREVISIAE | yes |
| 2182 | O60488 | P47912 | YMR246W | FAA4 | NE | 24269233 | ACSL4 | H. SAPIENS | S. CEREVISIAE | yes |
| 10999 | Q6P1M0 | P47912 | YMR246W | FAA4 | NE | 24269233 | SLC27A4|ACSVL4 | H. SAPIENS | S. CEREVISIAE | yes |
| 11001 | O14975 | P47912 | YMR246W | FAA4 | NE | 24269233 | SLC27A2|ACSLV1 | H. SAPIENS | S. CEREVISIAE | yes |
| 23305 | Q9UKU0 | P47912 | YMR246W | FAA4 | NE | 24269233 | ACSL6 | H. SAPIENS | S. CEREVISIAE | yes |
| 51703 | Q9ULC5 | P47912 | YMR246W | FAA4 | NE | 24269233 | ACSL5 | H. SAPIENS | S. CEREVISIAE | yes |
| 2643 | P30793 | P51601 | YGR267C | FOL2 | E | 10049741 | ENSP00000352686|ENSP00000254299 | H. SAPIENS | S. CEREVISIAE | yes |
| 2643 | P30793 | P51601 | YGR267C | FOL2 | E | 15303002 | ENSP00000352686|ENSP00000254299 | H. SAPIENS | S. CEREVISIAE | yes |
| 3295 | P51659 | Q02207 | YKR009C | FOX2 | NE | 10671535 | HSD17B4 | H. SAPIENS | S. CEREVISIAE | yes |
| 3295 | P51659 | Q02207 | YKR009C | FOX2 | NE | 23308274 | HSD17B4 | H. SAPIENS | S. CEREVISIAE | yes |
| 23413 | P62166 | Q06389 | YDR373W | FRQ1 | E | 14512421 | NCS1 | H. SAPIENS | S. CEREVISIAE | yes |
| 1967 | Q14232 | P14741 | YKR026C | GCN3 | NE | 21795329 | EIF2B1 | H. SAPIENS | S. CEREVISIAE | yes |
| 231 | P15121 | P14065 | YOR120W | GCY1 | NE | 17140678 | AKR1B1 | H. SAPIENS | S. CEREVISIAE | yes |
| 55858 | Q9HC07 | P38301 | YBR187W | GDT1 | NE | 23569283 | TMEM165 | H. SAPIENS | S. CEREVISIAE | yes |
| 7555 | P62633 | P53849 | YNL255C | GIS2 | NE | 21232131 | CNBP | H. SAPIENS | S. CEREVISIAE | yes |
| 55650 | Q9NUD9 | P38211 | YBR004C | GPI18 | E | 15623507 | PIGV | H. SAPIENS | S. CEREVISIAE | yes |
| 55650 | Q9NUD9 | P38211 | YBR004C | GPI18 | E | 15720390 | PIGV | H. SAPIENS | S. CEREVISIAE | yes |
| 51218 | Q86SX6 | Q02784 | YPL059W | GRX5 | NE | 16566929 | GLRX5 | H. SAPIENS | S. CEREVISIAE | yes |
| 2937 | P48637 | Q08220 | YOL049W | GSH2 | NE | 14657499 | GSS | H. SAPIENS | S. CEREVISIAE | yes |
| 210 | P13716 | P05373 | YGL040C | HEM2 | E | 2178784 | ALAD | H. SAPIENS | S. CEREVISIAE | yes |
| 224 | P51648 | Q04458 | YMR110C | HFD1 | NE | 22633490 | ALDH3A2 | H. SAPIENS | S. CEREVISIAE | yes |
| 10294 | O60884 | P48353 | YMR161W | HLJ1 | NE | 14657499 | DNAJA2 | H. SAPIENS | S. CEREVISIAE | yes |
| 51726 | Q9UBS4 | P48353 | YMR161W | HLJ1 | NE | 19748898 | DNAJB11 | H. SAPIENS | S. CEREVISIAE | yes |
| 3156 | P04035 | P12683 | YML075C | HMG1 | NE | 19187128 | HMGCR | H. SAPIENS | S. CEREVISIAE | yes |
| 3156 | P04035 | P12683 | YML075C | HMG1 | NE | 20041128 | HMGCR | H. SAPIENS | S. CEREVISIAE | yes |
| 3156 | P04035 | P12684 | YLR450W | HMG2 | NE | 19187128 | HMGCR | H. SAPIENS | S. CEREVISIAE | yes |
| 3156 | P04035 | P12684 | YLR450W | HMG2 | NE | 20041128 | HMGCR | H. SAPIENS | S. CEREVISIAE | yes |
| 3094 | P49773 | Q04344 | YDL125C | HNT1 | NE | 22961002 | HINT1 | H. SAPIENS | S. CEREVISIAE | yes |
| 3326 | P08238 | P15108 | YMR186W | HSC82 | NE | 7637703 | HSP90AB1 | H. SAPIENS | S. CEREVISIAE | yes |
| 3320 | P07900 | P15108 | YMR186W | HSC82 | NE | 8289821 | HSP90AA1 | H. SAPIENS | S. CEREVISIAE | yes |
| 3326 | P08238 | P15108 | YMR186W | HSC82 | NE | 12527207 | HSP90AB1 | H. SAPIENS | S. CEREVISIAE | yes |
| 3320 | P07900 | P15108 | YMR186W | HSC82 | NE | 16171778 | HSP90AA1 | H. SAPIENS | S. CEREVISIAE | yes |
| 3326 | P08238 | P15108 | YMR186W | HSC82 | NE | 16171778 | HSP90AB1 | H. SAPIENS | S. CEREVISIAE | yes |
| 3326 | P08238 | P02829 | YPL240C | HSP82 | NE | 7637703 | HSP90AB1 | H. SAPIENS | S. CEREVISIAE | yes |
| 3320 | P07900 | P02829 | YPL240C | HSP82 | NE | 8289821 | HSP90AA1 | H. SAPIENS | S. CEREVISIAE | yes |
| 3326 | P08238 | P02829 | YPL240C | HSP82 | NE | 12527207 | HSP90AB1 | H. SAPIENS | S. CEREVISIAE | yes |
| 3320 | P07900 | P02829 | YPL240C | HSP82 | NE | 16171778 | HSP90AA1 | H. SAPIENS | S. CEREVISIAE | yes |
| 3326 | P08238 | P02829 | YPL240C | HSP82 | NE | 16171778 | HSP90AB1 | H. SAPIENS | S. CEREVISIAE | yes |
| 3035 | P12081 | P07263 | YPR033C | HTS1 | E | 22930593 | HARS | H. SAPIENS | S. CEREVISIAE | yes |
| 2645 | P35557 | P04807 | YGL253W | HXK2 | NE | 11571755 | GCK | H. SAPIENS | S. CEREVISIAE | yes |
| 51099 | Q8WTS1 | Q12385 | YLR099C | ICT1 | NE | 18606822 | ABHD5 | H. SAPIENS | S. CEREVISIAE | yes |
| 1017 | P24941 | P32581 | YJL106W | IME2 | NE | 19197163 | CDK2 | H. SAPIENS | S. CEREVISIAE | yes |
| 4763 | P21359 | P18963 | YBR140C | IRA1 | E | 2121369 | ENSP00000351015|ENSP00000348498 | H. SAPIENS | S. CEREVISIAE | yes |
| 4763 | P21359 | P18963 | YBR140C | IRA1 | E | 2121371 | ENSP00000351015|ENSP00000348498 | H. SAPIENS | S. CEREVISIAE | yes |
| 5921 | P20936 | P18963 | YBR140C | IRA1 | E | 7867061 |  | H. SAPIENS | S. CEREVISIAE | yes |
| 4763 | P21359 | P19158 | YOL081W | IRA2 | NE | 2121369 | ENSP00000351015|ENSP00000348498 | H. SAPIENS | S. CEREVISIAE | yes |
| 4763 | P21359 | P19158 | YOL081W | IRA2 | NE | 2121371 | ENSP00000351015|ENSP00000348498 | H. SAPIENS | S. CEREVISIAE | yes |
| 23479 | Q9H1K1 | Q03020 | YPL135W | ISU1 | NE | 15143178 | ENSP00000344584 | H. SAPIENS | S. CEREVISIAE | yes |
| 23479 | Q9H1K1 | Q03020 | YPL135W | ISU1 | NE | 15143178 | ENSP00000310623 | H. SAPIENS | S. CEREVISIAE | yes |
| 23479 | Q9H1K1 | Q12056 | YOR226C | ISU2 | NE | 15143178 | ENSP00000344584 | H. SAPIENS | S. CEREVISIAE | yes |
| 23479 | Q9H1K1 | Q12056 | YOR226C | ISU2 | NE | 15143178 | ENSP00000310623 | H. SAPIENS | S. CEREVISIAE | yes |
| 7454 | P42768 | Q12446 | YOR181W | LAS17 | E | 16488394 | WAS | H. SAPIENS | S. CEREVISIAE | yes |
| 1738 | P09622 | P09624 | YFL018C | LPD1 | NE | 8894701 | DLD | H. SAPIENS | S. CEREVISIAE | yes |
| 1738 | P09622 | P09624 | YFL018C | LPD1 | NE | 21930696 | DLD | H. SAPIENS | S. CEREVISIAE | yes |
| 5885 | O60216 | Q12158 | YDL003W | MCD1 | E | 18614046 | RAD21 | H. SAPIENS | S. CEREVISIAE | yes |
| 3954 | O95202 | Q08179 | YOL027C | MDM38 | NE | 15904662 | ENSP00000305653 | H. SAPIENS | S. CEREVISIAE | yes |
| 4524 | P42898 | P53128 | YGL125W | MET13 | NE | 10600168 | ENSP00000315965 | H. SAPIENS | S. CEREVISIAE | yes |
| 9060 | O95340 | P08536 | YJR010W | MET3 | NE | 15583009 | PAPSS2 | H. SAPIENS | S. CEREVISIAE | yes |
| 10482 | Q9UBU9 | Q99257 | YPL169C | MEX67 | E | 10228171 | NXF1 | H. SAPIENS | S. CEREVISIAE | yes |
| 5428 | P54098 | P15801 | YOR330C | MIP1 | NE | 24398692 | POLG | H. SAPIENS | S. CEREVISIAE | yes |
| 4292 | P40692 | P38920 | YMR167W | MLH1 | NE | 19863800 | MLH1 | H. SAPIENS | S. CEREVISIAE | yes |
| 29098 | Q9HD47 | P47123 | YJR074W | MOG1 | NE | 11290418 | RANGRF | H. SAPIENS | S. CEREVISIAE | yes |
| 51660 | Q9Y5U8 | P53157 | YGL080W | MPC1 | NE | 22628558 | MPC1 | H. SAPIENS | S. CEREVISIAE | yes |
| 57038 | Q5T160 | P38714 | YHR091C | MSR1 | NE | 22569581 | RARS2 | H. SAPIENS | S. CEREVISIAE | yes |
| 25821 | Q9Y2Z2 | P53070 | YGL236C | MTO1 | NE | 12011058 | ENSP00000322398|ENSP00000322654|ENSP00000350506 | H. SAPIENS | S. CEREVISIAE | yes |
| 23395 | Q15031 | P11325 | YLR382C | NAM2 | NE | 11087829 | LARS2 | H. SAPIENS | S. CEREVISIAE | yes |
| 54888 | Q08J23 | P38205 | YBL024W | NCL1 | NE | 17071714 | NSUN2 | H. SAPIENS | S. CEREVISIAE | yes |
| 55651 | Q9NX24 | P32495 | YDL208W | NHP2 | E | 11074001 | NHP2 | H. SAPIENS | S. CEREVISIAE | yes |
| 133308 | Q86UD5 | Q04121 | YDR456W | NHX1 | NE | 18000046 | SLC9B2 | H. SAPIENS | S. CEREVISIAE | yes |
| 55505 | Q9NPE3 | Q6Q547 | YHR072W-A | NOP10 | NE | 11074001 | NOP10 | H. SAPIENS | S. CEREVISIAE | yes |
| 94103 | Q8N138 | P53224 | YGR038W | ORM1 | NE | 12093374 | ORMDL3 | H. SAPIENS | S. CEREVISIAE | yes |
| 94103 | Q8N138 | Q06144 | YLR350W | ORM2 | NE | 12093374 | ORMDL3 | H. SAPIENS | S. CEREVISIAE | yes |
| 23175 | Q14693 | P32567 | YMR165C | PAH1 | NE | 18694939 | LPIN1 | H. SAPIENS | S. CEREVISIAE | yes |
| 23175 | Q14693 | P32567 | YMR165C | PAH1 | NE | 20583302 | LPIN1 | H. SAPIENS | S. CEREVISIAE | yes |
| 9663 | Q92539 | P32567 | YMR165C | PAH1 | NE | 22481384 | LPIN2 | H. SAPIENS | S. CEREVISIAE | yes |
| 64900 | Q9BQK8 | P32567 | YMR165C | PAH1 | NE | 22481384 | LPIN3 | H. SAPIENS | S. CEREVISIAE | yes |
| 55486 | Q9H300 | P53259 | YGR101W | PCP1 | NE | 12774122 | PARL | H. SAPIENS | S. CEREVISIAE | yes |
| 55486 | Q9H300 | P53259 | YGR101W | PCP1 | NE | 17615298 | PARL | H. SAPIENS | S. CEREVISIAE | yes |
| 5213 | P08237 | P16861 | YGR240C | PFK1 | NE | 7825568 | PFKM | H. SAPIENS | S. CEREVISIAE | yes |
| 5213 | P08237 | P16861 | YGR240C | PFK1 | NE | 8344431 | PFKM | H. SAPIENS | S. CEREVISIAE | yes |
| 5213 | P08237 | P16862 | YMR205C | PFK2 | NE | 7825568 | PFKM | H. SAPIENS | S. CEREVISIAE | yes |
| 5213 | P08237 | P16862 | YMR205C | PFK2 | NE | 8344431 | PFKM | H. SAPIENS | S. CEREVISIAE | yes |
| 5250 | Q00325 | P40035 | YER053C | PIC2 | NE | 17273968 | SLC25A3 | H. SAPIENS | S. CEREVISIAE | yes |
| 80119 | Q9H611 | P07271 | YML061C | PIF1 | NE | 23657261 | PIF1 | H. SAPIENS | S. CEREVISIAE | yes |
| 5583 | P24723 | P24583 | YBL105C | PKC1 | E | 9427282 | PRKCH | H. SAPIENS | S. CEREVISIAE | yes |
| 5170 | O15530 | Q03407 | YDR490C | PKH1 | NE | 10074427 | ENSP00000344220|ENSP00000346895 | H. SAPIENS | S. CEREVISIAE | yes |
| 5170 | O15530 | Q03407 | YDR490C | PKH1 | NE | 10567559 | ENSP00000344220|ENSP00000346895 | H. SAPIENS | S. CEREVISIAE | yes |
| 5170 | O15530 | Q12236 | YOL100W | PKH2 | NE | 10074427 | ENSP00000344220|ENSP00000346895 | H. SAPIENS | S. CEREVISIAE | yes |
| 5170 | O15530 | Q12236 | YOL100W | PKH2 | NE | 10567559 | ENSP00000344220|ENSP00000346895 | H. SAPIENS | S. CEREVISIAE | yes |
| 27032 | P98194 | P13586 | YGL167C | PMR1 | NE | 11741891 | ENSP00000306816|ENSP00000329664|ENSP00000352665 | H. SAPIENS | S. CEREVISIAE | yes |
| 27032 | P98194 | P13586 | YGL167C | PMR1 | NE | 15610533 | ENSP00000306816|ENSP00000329664|ENSP00000352665 | H. SAPIENS | S. CEREVISIAE | yes |
| 27032 | P98194 | P13586 | YGL167C | PMR1 | NE | 15811312 | ENSP00000306816|ENSP00000329664|ENSP00000349901|ENSP00000352580|ENSP00000352665 | H. SAPIENS | S. CEREVISIAE | yes |
| 5395 | P54278 | P14242 | YNL082W | PMS1 | NE | 19863800 | PMS2 | H. SAPIENS | S. CEREVISIAE | yes |
| 4860 | P00491 | Q05788 | YLR209C | PNP1 | NE | 19001417 | PNP | H. SAPIENS | S. CEREVISIAE | yes |
| 5423 | P06746 | P25615 | YCR014C | POL4 | NE | 15964833 | POLB | H. SAPIENS | S. CEREVISIAE | yes |
| 27343 | Q9UGP5 | P25615 | YCR014C | POL4 | NE | 15964833 | POLL | H. SAPIENS | S. CEREVISIAE | yes |
| 7416 | P21796 | P04840 | YNL055C | POR1 | NE | 25171321 | VDAC1 | H. SAPIENS | S. CEREVISIAE | yes |
| 5831 | P32322 | P32263 | YER023W | PRO3 | E | 1730675 | PYCR | H. SAPIENS | S. CEREVISIAE | yes |
| 8659 | P30038 | P07275 | YHR037W | PUT2 | NE | 8621661 | ALDH4A1 | H. SAPIENS | S. CEREVISIAE | yes |
| 8659 | P30038 | P07275 | YHR037W | PUT2 | NE | 9700195 | ALDH4A1 | H. SAPIENS | S. CEREVISIAE | yes |
| 215 | P33897 | P41909 | YPL147W | PXA1 | NE | 18757502 |  | H. SAPIENS | S. CEREVISIAE | yes |
| 215 | P33897 | P41909 | YPL147W | PXA1 | NE | 21145416 |  | H. SAPIENS | S. CEREVISIAE | yes |
| 225 | Q9UBJ2 | P41909 | YPL147W | PXA1 | NE | 21145416 |  | H. SAPIENS | S. CEREVISIAE | yes |
| 215 | P33897 | P34230 | YKL188C | PXA2 | E | 18757502 |  | H. SAPIENS | S. CEREVISIAE | yes |
| 215 | P33897 | P34230 | YKL188C | PXA2 | E | 21145416 |  | H. SAPIENS | S. CEREVISIAE | yes |
| 225 | Q9UBJ2 | P34230 | YKL188C | PXA2 | E | 21145416 |  | H. SAPIENS | S. CEREVISIAE | yes |
| 2237 | P39748 | P26793 | YKL113C | RAD27 | NE | 9830061 | FEN1 | H. SAPIENS | S. CEREVISIAE | yes |
| 2237 | P39748 | P26793 | YKL113C | RAD27 | NE | 10545607 | FEN1 | H. SAPIENS | S. CEREVISIAE | yes |
| 2237 | P39748 | P26793 | YKL113C | RAD27 | NE | 16914748 | FEN1 | H. SAPIENS | S. CEREVISIAE | yes |
| 2237 | P39748 | P26793 | YKL113C | RAD27 | NE | 18443037 | FEN1 | H. SAPIENS | S. CEREVISIAE | yes |
| 2068 | P18074 | P06839 | YER171W | RAD3 | E | 7629061 | ENSP00000221481 | H. SAPIENS | S. CEREVISIAE | yes |
| 2068 | P18074 | P06839 | YER171W | RAD3 | E | 8413672 | ENSP00000221481 | H. SAPIENS | S. CEREVISIAE | yes |
| 5429 | Q9Y253 | Q04049 | YDR419W | RAD30 | NE | 11743006 | POLH | H. SAPIENS | S. CEREVISIAE | yes |
| 5429 | Q9Y253 | Q04049 | YDR419W | RAD30 | NE | 18281311 | POLH | H. SAPIENS | S. CEREVISIAE | yes |
| 11201 | Q9UNA4 | Q04049 | YDR419W | RAD30 | NE | 18281311 | POLI | H. SAPIENS | S. CEREVISIAE | yes |
| 51426 | Q9UBT6 | Q04049 | YDR419W | RAD30 | NE | 18281311 | POLK | H. SAPIENS | S. CEREVISIAE | yes |
| 10111 | Q92878 | P12753 | YNL250W | RAD50 | NE | 10415333 |  | H. SAPIENS | S. CEREVISIAE | yes |
| 11200 | O96017 | P22216 | YPL153C | RAD53 | E | 15649950 |  | H. SAPIENS | S. CEREVISIAE | yes |
| 7319 | P49459 | P06104 | YGL058W | RAD6 | NE | 19410543 | UBE2A | H. SAPIENS | S. CEREVISIAE | yes |
| 7320 | P63146 | P06104 | YGL058W | RAD6 | NE | 19410543 | UBE2B | H. SAPIENS | S. CEREVISIAE | yes |
| 3265 | P01112 | P01119 | YOR101W | RAS1 | NE | 2981628 | ENSP00000309845 | H. SAPIENS | S. CEREVISIAE | yes |
| 3265 | P01112 | P01120 | YNL098C | RAS2 | NE | 2981628 | ENSP00000309845 | H. SAPIENS | S. CEREVISIAE | yes |
| 79947 | Q86SQ9 | P35196 | YBR002C | RER2 | E | 12591616 | DHDDS | H. SAPIENS | S. CEREVISIAE | yes |
| 79947 | Q86SQ9 | P35196 | YBR002C | RER2 | E | 14652022 | DHDDS | H. SAPIENS | S. CEREVISIAE | yes |
| 5429 | Q9Y253 | P14284 | YPL167C | REV3 | NE | 18281311 | POLH | H. SAPIENS | S. CEREVISIAE | yes |
| 11201 | Q9UNA4 | P14284 | YPL167C | REV3 | NE | 18281311 | POLI | H. SAPIENS | S. CEREVISIAE | yes |
| 51426 | Q9UBT6 | P14284 | YPL167C | REV3 | NE | 18281311 | POLK | H. SAPIENS | S. CEREVISIAE | yes |
| 91869 | Q96AA3 | P38206 | YBL020W | RFT1 | E | 18313027 | RFT1 | H. SAPIENS | S. CEREVISIAE | yes |
| 387 | P61586 | P06780 | YPR165W | RHO1 | E | 7937763 | RHOA | H. SAPIENS | S. CEREVISIAE | yes |
| 387 | P61586 | P06780 | YPR165W | RHO1 | E | 8947028 | ENSP00000265538 | H. SAPIENS | S. CEREVISIAE | yes |
| 387 | P61586 | P06780 | YPR165W | RHO1 | E | 9197407 | ENSP00000265538 | H. SAPIENS | S. CEREVISIAE | yes |
| 2932 | P49841 | P38615 | YMR139W | RIM11 | NE | 16114883 |  | H. SAPIENS | S. CEREVISIAE | yes |
| 6341 | O75880 | P23833 | YBR037C | SCO1 | NE | 17430883 | SCO1 | H. SAPIENS | S. CEREVISIAE | yes |
| 9218 | Q9P0L0 | P40075 | YER120W | SCS2 | NE | 15668246 | VAPA | H. SAPIENS | S. CEREVISIAE | yes |
| 6390 | P21912 | P21801 | YLL041C | SDH2 | NE | 19261679 | SDHB | H. SAPIENS | S. CEREVISIAE | yes |
| 22845 | Q9UPQ8 | P20048 | YMR013C | SEC59 | E | 17273964 | DOLK | H. SAPIENS | S. CEREVISIAE | yes |
| 7095 | Q99442 | P21825 | YPL094C | SEC62 | E | 20071467 | SEC62 | H. SAPIENS | S. CEREVISIAE | yes |
| 641 | P54132 | P35187 | YMR190C | SGS1 | NE | 9671747 | ENSP00000347232|ENSP00000349859 | H. SAPIENS | S. CEREVISIAE | yes |
| 641 | P54132 | P35187 | YMR190C | SGS1 | NE | 10069810 | ENSP00000347232|ENSP00000349859 | H. SAPIENS | S. CEREVISIAE | yes |
| 641 | P54132 | P35187 | YMR190C | SGS1 | NE | 15994923 | ENSP00000347232|ENSP00000349859 | H. SAPIENS | S. CEREVISIAE | yes |
| 23411 | Q96EB6 | P06700 | YDL042C | SIR2 | NE | 24349441 | SIRT1 | H. SAPIENS | S. CEREVISIAE | yes |
| 55687 | O75648 | Q12093 | YDL033C | SLM3 | NE | 15509579 | TRMU | H. SAPIENS | S. CEREVISIAE | yes |
| 6647 | P00441 | P00445 | YJR104C | SOD1 | NE | 10601249 | SOD1 | H. SAPIENS | S. CEREVISIAE | yes |
| 6647 | P00441 | P00445 | YJR104C | SOD1 | NE | 10882731 | SOD1 | H. SAPIENS | S. CEREVISIAE | yes |
| 6647 | P00441 | P00445 | YJR104C | SOD1 | NE | 14729672 | SOD1 | H. SAPIENS | S. CEREVISIAE | yes |
| 6647 | P00441 | P00445 | YJR104C | SOD1 | NE | 15069187 | SOD1 | H. SAPIENS | S. CEREVISIAE | yes |
| 6647 | P00441 | P00445 | YJR104C | SOD1 | NE | 18977757 | SOD1 | H. SAPIENS | S. CEREVISIAE | yes |
| 6647 | P00441 | P00447 | YHR008C | SOD2 | NE | 14729672 | SOD1 | H. SAPIENS | S. CEREVISIAE | yes |
| 6648 | P04179 | P00447 | YHR008C | SOD2 | NE | 22561997 | SOD2 | H. SAPIENS | S. CEREVISIAE | yes |
| 3996 | Q15334 | Q12038 | YPR032W | SRO7 | NE | 9691031 | LLGL1 | H. SAPIENS | S. CEREVISIAE | yes |
| 3996 | Q15334 | P38163 | YBL106C | SRO77 | NE | 9691031 | LLGL1 | H. SAPIENS | S. CEREVISIAE | yes |
| 10269 | O75844 | P47154 | YJR117W | STE24 | NE | 10692417 | ZMPSTE24 | H. SAPIENS | S. CEREVISIAE | yes |
| 10269 | O75844 | P47154 | YJR117W | STE24 | NE | 12913070 | ZMPSTE24 | H. SAPIENS | S. CEREVISIAE | yes |
| 10681 | O14775 | P18851 | YOR212W | STE4 | NE | 15474482 | GNB5 | H. SAPIENS | S. CEREVISIAE | yes |
| 7919 | Q13838 | Q07478 | YDL084W | SUB2 | E | 15047853 | DDX39B | H. SAPIENS | S. CEREVISIAE | yes |
| 10212 | O00148 | Q07478 | YDL084W | SUB2 | E | 15047853 | DDX39A | H. SAPIENS | S. CEREVISIAE | yes |
| 4358 | P39210 | Q06563 | YLR251W | SYM1 | NE | 15189984 | MPV17 | H. SAPIENS | S. CEREVISIAE | yes |
| 4358 | P39210 | Q06563 | YLR251W | SYM1 | NE | 16582910 | MPV17 | H. SAPIENS | S. CEREVISIAE | yes |
| 27158 | Q9UHB4 | Q12181 | YPR048W | TAH18 | E | 20802492 | NDOR1 | H. SAPIENS | S. CEREVISIAE | yes |
| 6901 | Q16635 | Q06510 | YPR140W | TAZ1 | NE | 15304507 | TAZ | H. SAPIENS | S. CEREVISIAE | yes |
| 10576 | P78371 | P12612 | YDR212W | TCP1 | E | 16973440 | CCT2 | H. SAPIENS | S. CEREVISIAE | yes |
| 1678 | O60220 | P57744 | YJR135W-A | TIM8 | NE | 11489896 | TIMM8A | H. SAPIENS | S. CEREVISIAE | yes |
| 1678 | O60220 | P57744 | YJR135W-A | TIM8 | NE | 11956200 | TIMM8A | H. SAPIENS | S. CEREVISIAE | yes |
| 8675 | O14662 | Q08144 | YOL018C | TLG2 | NE | 19509055 | STX16 | H. SAPIENS | S. CEREVISIAE | yes |
| 7150 | P11387 | P04786 | YOL006C | TOP1 | NE | 11733535 | TOP1 | H. SAPIENS | S. CEREVISIAE | yes |
| 7153 | P11388 | P06786 | YNL088W | TOP2 | E | 8393377 | TOP2A | H. SAPIENS | S. CEREVISIAE | yes |
| 7153 | P11388 | P06786 | YNL088W | TOP2 | E | 10416608 | TOP2A | H. SAPIENS | S. CEREVISIAE | yes |
| 7153 | P11388 | P06786 | YNL088W | TOP2 | E | 10636919 | TOP2A | H. SAPIENS | S. CEREVISIAE | yes |
| 7153 | P11388 | P06786 | YNL088W | TOP2 | E | 12646164 | TOP2A | H. SAPIENS | S. CEREVISIAE | yes |
| 7153 | P11388 | P06786 | YNL088W | TOP2 | E | 14500835 | TOP2A | H. SAPIENS | S. CEREVISIAE | yes |
| 7153 | P11388 | P06786 | YNL088W | TOP2 | E | 15026536 | TOP2A | H. SAPIENS | S. CEREVISIAE | yes |
| 6399 | P0DI82 | P38334 | YBR254C | TRS20 | E | 14597397 | TRAPPC2 | H. SAPIENS | S. CEREVISIAE | yes |
| 7284 | P49411 | P02992 | YOR187W | TUF1 | NE | 23727608 | TUFM | H. SAPIENS | S. CEREVISIAE | yes |
| 8565 | P54577 | P36421 | YGR185C | TYS1 | E | 9427763 | YARS | H. SAPIENS | S. CEREVISIAE | yes |
| 7329 | P63279 | P50623 | YDL064W | UBC9 | E | 8668125 | UBE2I | H. SAPIENS | S. CEREVISIAE | yes |
| 7374 | P13051 | P12887 | YML021C | UNG1 | NE | 11812822 | UNG | H. SAPIENS | S. CEREVISIAE | yes |
| 1723 | Q02127 | P28272 | YKL216W | URA1 | NE | 1446837 | DHODH | H. SAPIENS | S. CEREVISIAE | yes |
| 525 | P15313 | P16140 | YBR127C | VMA2 | NE | 18368028 | ATP6V1B1 | H. SAPIENS | S. CEREVISIAE | yes |
| 1201 | Q13286 | P47040 | YJL059W | YHC3 | NE | 9618513 | CLN3 | H. SAPIENS | S. CEREVISIAE | yes |
| 1201 | Q13286 | P47040 | YJL059W | YHC3 | NE | 17475770 | CLN3 | H. SAPIENS | S. CEREVISIAE | yes |
| 6446 | O00141 | P12688 | YKL126W | YPK1 | NE | 20516150 | SGK1 | H. SAPIENS | S. CEREVISIAE | yes |
| 231 | P15121 | Q12458 | YDR368W | YPR1 | NE | 17140678 | AKR1B1 | H. SAPIENS | S. CEREVISIAE | yes |
| 6687 | Q9UQ90 | P40341 | YMR089C | YTA12 | NE | 14623864 | SPG7 | H. SAPIENS | S. CEREVISIAE | yes |
| 10939 | Q9Y4W6 | P40341 | YMR089C | YTA12 | NE | 14623864 | AFG3L2 | H. SAPIENS | S. CEREVISIAE | yes |
| 10939 | Q9Y4W6 | P40341 | YMR089C | YTA12 | NE | 20208537 | AFG3L2 | H. SAPIENS | S. CEREVISIAE | yes |
| 2539 | P11413 | P11412 | YNL241C | ZWF1 | NE | 14757426 | G6PD | H. SAPIENS | S. CEREVISIAE | yes |
| 8260 | P41227 | P07347 | YHR013C | ARD1 | NE | 19420222 | NAA10 | H. SAPIENS | S. CEREVISIAE | no |
| 23590 | Q5T2R2 | P18900 | YBR003W | COQ1 | NE | 17332895 | PDSS1 | H. SAPIENS | S. CEREVISIAE | no |
| 84274 | Q5HYK3 | P49017 | YML110C | COQ5 | NE | 25152161 | COQ5 | H. SAPIENS | S. CEREVISIAE | no |
| 57017 | O75208 | Q05779 | YLR201C | COQ9 | NE | 19375058 | COQ9 | H. SAPIENS | S. CEREVISIAE | no |
| 5478 | P62937 | P14832 | YDR155C | CPR1 | NE | 15643056 | PPIA | H. SAPIENS | S. CEREVISIAE | no |
| 8813 | O60762 | P14020 | YPR183W | DPM1 | E | 9223280 | DPM1 | H. SAPIENS | S. CEREVISIAE | no |
| 84735 | Q96KN2 | P43616 | YFR044C | DUG1 | NE | 19346245 | CNDP1 | H. SAPIENS | S. CEREVISIAE | no |
| 2671 | P55789 | P27882 | YGR029W | ERV1 | E | 10384986 | GFER | H. SAPIENS | S. CEREVISIAE | no |
| 5303 | Q9Y237 | P22696 | YJR017C | ESS1 | E | 11118437 | PIN4 | H. SAPIENS | S. CEREVISIAE | no |
| 7015 | O14746 | Q06163 | YLR318W | EST2 | NE | 15047858 | TERT | H. SAPIENS | S. CEREVISIAE | no |
| 2645 | P35557 | P04806 | YFR053C | HXK1 | NE | 11571755 | GCK | H. SAPIENS | S. CEREVISIAE | no |
| 2956 | P52701 | P25847 | YOL090W | MSH2 | NE | 9889267 | MSH6 | H. SAPIENS | S. CEREVISIAE | no |
| 4436 | P43246 | P25847 | YOL090W | MSH2 | NE | 9889267 | MSH2 | H. SAPIENS | S. CEREVISIAE | no |
| 4437 | P20585 | P25847 | YOL090W | MSH2 | NE | 9889267 | MSH3 | H. SAPIENS | S. CEREVISIAE | no |
| 7381 | P14927 | P00128 | YDR529C | QCR7 | NE | 10491129 | UQCRB | H. SAPIENS | S. CEREVISIAE | no |
| 9156 | Q9UQ84 | P26793 | YKL113C | RAD27 | NE | 9823303 | EXO1 | H. SAPIENS | S. CEREVISIAE | no |
| 6118 | P15927 | P26754 | YNL312W | RFA2 | E | 1885001 | RPA2 | H. SAPIENS | S. CEREVISIAE | no |
| 5434 | P19388 | P20434 | YBR154C | RPB5 | E | 7651387 | POLR2E | H. SAPIENS | S. CEREVISIAE | no |
| 5434 | P19388 | P20434 | YBR154C | RPB5 | E | 8524256 | POLR2E | H. SAPIENS | S. CEREVISIAE | no |
| 51119 | Q9Y3A5 | Q07953 | YLR022C | SDO1 | E | 15701631 | SBDS | H. SAPIENS | S. CEREVISIAE | no |
| 6594 | P28370 | P22082 | YOR290C | SNF2 | NE | 1408766 | SMARCA1 | H. SAPIENS | S. CEREVISIAE | no |
| 6598 | Q12824 | P18480 | YBR289W | SNF5 | NE | 16154112 | SMARCB1 | H. SAPIENS | S. CEREVISIAE | no |
| 9973 | O14618 | P00445 | YJR104C | SOD1 | NE | 10601249 | CCS | H. SAPIENS | S. CEREVISIAE | no |
| 6908 | P20226 | P13393 | YER148W | SPT15 | E | 15225551 | TBP | H. SAPIENS | S. CEREVISIAE | no |
| 2782 | P62873 | P18851 | YOR212W | STE4 | NE | 8789259 | GNB1 | H. SAPIENS | S. CEREVISIAE | no |
| 6594 | P28370 | P32597 | YIL126W | STH1 | E | 1408766 | SMARCA1 | H. SAPIENS | S. CEREVISIAE | no |
| 50617 | Q9HBG4 | P37296 | YMR054W | STV1 | NE | 18632794 | ATP6V0A4 | H. SAPIENS | S. CEREVISIAE | no |
| 60528 | Q9BQ52 | P36159 | YKR079C | TRZ1 | E | 15892892 | ELAC2 | H. SAPIENS | S. CEREVISIAE | no |
| 50617 | Q9HBG4 | P32563 | YOR270C | VPH1 | NE | 18632794 | ATP6V0A4 | H. SAPIENS | S. CEREVISIAE | no |
| 55737 | Q96QK1 | P34110 | YJL154C | VPS35 | NE | 17916227 | VPS35 | H. SAPIENS | S. CEREVISIAE | no |
| 55737 | Q96QK1 | P34110 | YJL154C | VPS35 | NE | 24740878 | VPS35 | H. SAPIENS | S. CEREVISIAE | no |

**Supplemental Table S3. 179 variants and functional scores.**

| Gene | aa pos | wt | mut | label* | FCS | PolyPhen2  ** | FCT | SIFT | PROVEAN | CADD | Alignment  *** | pmid | HGMD_acc_num/dbSNP_rs_num | HGMD annotation  **** | CLINVAR_clinical_Significance | MAF_ExAC | MAF_dbSNP | Literature  recuration |
| --- | --- | --- | --- | --- | --- | --- | --- | --- | --- | --- | --- | --- | --- | --- | --- | --- | --- | --- |
| UBE2I | 25 | V | M | DV | 0 | 0.85 | -0.05 | 0.13 | -1.66 | 22.70 | 1 | 20863840 | CM109744 | DFP | #NA | #NA | #NA | #N/A |
| CALM1 | 98 | N | S | DV | 0.8 | 0.12 | 0.78 | 0.15 | -4.38 | 16.12 | 2 | 23040497 | CM128792 | DM | Pathogenic | #NA | #NA | #N/A |
| CALM1 | 53 | I | N | DV | 0.6 | 0.96 | 0.10 | 0.00 | -5.85 | 22.30 | 2 | 23040497 | CM128791 | DM | #NA | #NA | #NA | #N/A |
| CALM1 | 90 | F | L | DV | 0.6 | 0.89 | 0.29 | 0.00 | -5.48 | 17.67 | 3 | 24076290 | CM139641 | DM | Pathogenic | #NA | #NA | #N/A |
| CALM1 | 130 | D | G | DV | 0 | 0.98 | 0.20 | 0.00 | -4.31 | 17.27 | 1 | 23388215 | CM134270 | DM | Pathogenic | #NA | #NA | #N/A |
| CALM1 | 142 | F | L | DV | 0.6 | 0.89 | 0.28 | 0.01 | -3.28 | 13.69 | 3 | 23388215 | CM134271 | DM | Pathogenic | #NA | #NA | #N/A |
| DHDDS | 42 | K | E | DV | 0 | 0.57 | -0.02 | 0.12 | -3.65 | 21.00 | 3 | 21295282 | CM110930 | DM | Pathogenic | 0.000124 | #NA | causal |
| DHFR | 153 | D | V | DV | 1 | 0.61 | 0.90 | 0.02 | -6.49 | 19.82 | 3 | 21310277 | CM110928 | DM | Pathogenic | #NA | #NA | #N/A |
| DHFR | 80 | L | F | DV | 0 | 0.96 | 0.09 | 0.05 | -3.64 | 16.55 | 1 | 21310276 | CM110929 | DM | Pathogenic | 0.000008405 | #NA | causal |
| DPAGT1 | 170 | Y | C | DV | 0 | 1.00 | 0.10 | 0.00 | -8.87 | 23.10 | 3 | 12872255 | CM031959 | DM | Pathogenic | 0.000008 | #NA | #N/A |
| DPAGT1 | 69 | I | N | DV | 0 | 0.45 | 0.07 | 0.01 | -2.81 | 23.30 | 2 | 22492991 | CM128429 | DM | Pathogenic | #NA | #NA | #N/A |
| DPAGT1 | 108 | M | I | DV | 0 | 0.33 | -0.03 | 0.46 | -3.63 | 22.70 | 1 | 22742743 | CM126201 | DM | Pathogenic | #NA | #NA | #N/A |
| DPAGT1 | 29 | I | F | DV | 0.8 | 0.22 | 0.54 | 0.04 | -3.26 | 21.50 | 3 | 23249953 | CM1212768 | DM | Pathogenic | 0.000132 | #NA | causal |
| DPAGT1 | 297 | I | F | DV | 0.6 | 0.65 | 0.31 | 0.00 | -3.78 | 22.80 | 2 | 15771971 | CM058222 | DM | #NA | 0.000016 | #NA | #N/A |
| DPAGT1 | 301 | R | H | DV | 0.6 | 0.99 | 0.26 | 0.00 | -4.89 | 22.00 | 3 | 23430862 | CM119121 | DM | #NA | 0.000016 | #NA | #N/A |
| DPAGT1 | 385 | L | R | DV | 0 | 0.20 | 0.04 | 0.35 | -1.94 | 22.70 | 0 | 22786653 | CM126445 | DM | #NA | #NA | #NA | #N/A |
| DPAGT1 | 114 | A | G | DV | 0 | 0.14 | 0.03 | 0.41 | -3.67 | 23.10 | 2 | 22304930 | CM122210 | DM | Pathogenic | #NA | #NA | causal |
| DPAGT1 | 160 | G | S | DV | 0 | 0.84 | 0.23 | 0.02 | -5.28 | 22.90 | 1 | 22742743 | CM126205 | DM | #NA | #NA | #NA | causal |
| EMG1 | 86 | D | G | DV | 1 | 1.00 | 1.04 | #N/A | -6.99 | 23.20 | 3 | 19463982 | CM093502 | DM | #NA | #NA | #NA | #N/A |
| GDI1 | 92 | L | P | DV | 0.8 | 0.88 | 0.89 | 0.04 | -4.42 | 12.15 | 3 | 9620768 | CM980900 | DM | Pathogenic | #NA | #NA | causal |
| GDI1 | 423 | R | P | DV | 1 | 0.98 | 0.73 | 0.00 | -6.07 | 0.00 | 3 | 9668174 | CM980901 | DM | Pathogenic | #NA | #NA | #N/A |
| GLUL | 324 | R | C | DV | 0 | 0.42 | 0.44 | 0.00 | -7.37 | 28.80 | 3 | 16267323 | CM057402 | DM | Pathogenic | 0.000008 | #NA | causal |
| GLUL | 341 | R | C | DV | 1 | 0.56 | 1.00 | 0.01 | -7.37 | 29.80 | 3 | 16267323 | CM057403 | DM | Pathogenic | #NA | #NA | #N/A |
| NCS1 | 102 | R | Q | DV | 0 | 0.00 | -0.50 | 0.26 | 0.01 | 29.30 | 1 | 18801879 | CM088084 | DM | #NA | 0.000149 | #NA | #N/A |
| NHP2 | 126 | V | M | DV | 0.6 | 0.98 | 0.44 | 0.15 | 0.69 | 13.83 | 3 | 18523010 | CM082985 | DM | Pathogenic | #NA | #NA | #N/A |
| NHP2 | 139 | Y | H | DV | 0.6 | 0.99 | 0.49 | 0.01 | -4.34 | 19.37 | 2 | 18523010 | CM082986 | DM | Pathogenic | #NA | #NA | causal |
| NSDHL | 105 | A | V | DV | 1 | 1.00 | 0.59 | 0.00 | -3.98 | 30.00 | 3 | 10710235 | CM001397 | DM | Pathogenic | #NA | #NA | #N/A |
| NSDHL | 205 | G | S | DV | 1 | 1.00 | 0.94 | 0.00 | -5.81 | 27.60 | 3 | 10710235 | CM001398 | DM | Pathogenic | #NA | #NA | causal |
| NSDHL | 340 | C | R | DV | 1 | 0.95 | 1.34 | 0.02 | -7.51 | 26.00 | 1 | 15689440 | CM050369 | DM | #NA | #NA | #NA | #N/A |
| NSDHL | 147 | S | R | DV | 1 | 0.59 | 1.20 | 0.01 | -4.81 | 18.74 | 1 | 15689440 | CM050366 | DM | #NA | #NA | #NA | causal |
| NSDHL | 349 | Y | H | DV | 1 | 0.99 | 1.30 | 0.00 | -4.29 | 26.80 | 3 | 15689440 | CM050370 | DM | #NA | #NA | #NA | #N/A |
| NSDHL | 182 | A | P | DV | 1 | 0.36 | 1.97 | 0.10 | -1.96 | 28.20 | 1 | 11907515 | CM022482 | DM | Pathogenic | #NA | #NA | causal |
| NSDHL | 349 | Y | C | DV | 1 | 0.99 | 1.64 | 0.00 | -7.65 | 23.10 | 3 | 14527740 | CM034458 | DM | Pathogenic | #NA | #NA | #N/A |
| NSDHL | 132 | C | W | DV | 1 | 1.00 | 0.84 | 0.00 | -10.67 | 26.20 | 3 | 15689440 | CM050365 | DM | #NA | #NA | #NA | #N/A |
| NSDHL | 124 | G | S | DV | 1 | 1.00 | 1.29 | 0.00 | -5.97 | 33.00 | 3 | 15689440 | CM050364 | DM | Pathogenic | #NA | #NA | #N/A |
| PGK1 | 268 | D | N | DV | 0 | 0.01 | 0.41 | 0.21 | -0.92 | 15.30 | 1 | 7391028 | CM800013 | DM | Pathogenic | #NA | #NA | #N/A |
| PGK1 | 316 | C | R | DV | 0.8 | 0.93 | 0.62 | 0.04 | -5.64 | 22.30 | 3 | 1586722 | CM920577 | DM | Pathogenic | #NA | #NA | #N/A |
| PGK1 | 89 | L | P | DV | 0.6 | 0.97 | 0.46 | 0.00 | -6.66 | 28.80 | 3 | 2001457 | CM910296 | DM | #NA | #NA | #NA | #N/A |
| PGK1 | 206 | R | P | DV | 0 | 0.17 | 0.00 | 0.01 | -5.30 | 12.92 | 3 | 6933565 | CM800009 | DM | Pathogenic | #NA | #NA | #N/A |
| PGK1 | 320 | S | N | DV | 1 | 0.52 | 0.62 | 0.00 | -2.42 | 18.70 | 3 | 16412025 | CM055476 | DM | Pathogenic | #NA | #NA | #N/A |
| PGK1 | 354 | A | P | DV | 0.6 | 0.16 | -0.03 | 0.00 | -3.09 | 20.50 | 3 | 12956773 | CM032303 | DM | #NA | #NA | #NA | #N/A |
| PGK1 | 371 | I | K | DV | 0.8 | 1.00 | 0.74 | 0.00 | -6.47 | 20.30 | 3 | 22705348 | CM126863 | DM | #NA | #NA | #NA | #N/A |
| PGK1 | 47 | I | N | DV | 0.6 | 0.99 | 0.77 | 0.00 | -6.62 | 27.80 | 3 | 16412025 | CM055477 | DM | Pathogenic | #NA | #NA | #N/A |
| PGK1 | 253 | I | T | DV | 0 | 0.85 | 0.00 | 0.02 | -4.74 | 17.19 | 3 | 9512313 | CM981519 | DM | Pathogenic | #NA | #NA | #N/A |
| PGK1 | 378 | T | P | DV | 0.6 | 0.62 | 0.58 | 0.00 | -5.45 | 35.00 | 3 | 19157875 | CM091559 | DM | Pathogenic | #NA | #NA | #N/A |
| PGK1 | 285 | D | V | DV | 1 | 0.98 | 0.91 | 0.00 | -8.61 | 18.52 | 3 | 9744480 | CM981520 | DM | Pathogenic | #NA | #NA | #N/A |
| PGK1 | 164 | D | V | DV | 1 | 1.00 | 0.87 | 0.00 | -8.77 | 25.40 | 3 | 8043870 | CM941159 | DM | Pathogenic | #NA | #NA | #N/A |
| PGK1 | 315 | D | N | DV | 0.8 | 1.00 | 0.56 | 0.00 | -4.79 | 21.60 | 3 | 8043870 | CM941160 | DM | #NA | #NA | #NA | #N/A |
| PGK1 | 158 | G | V | DV | 0.8 | 1.00 | 0.63 | 0.00 | -8.29 | 28.50 | 1 | 1547346 | CM920576 | DM | Pathogenic | #NA | #NA | #N/A |
| PIN1 | 32 | S | C | DV | 1 | 0.99 | 1.19 | 0.00 | -4.82 | 22.50 | 3 | 23096908 | CM1212546 | DM | #NA | #NA | #NA | #N/A |
| PKLR | 407 | E | G | DV | 1 | 1.00 | #NA | 0.00 | -6.36 | 22.70 | 3 | 18759866 | CM090470 | DM | #NA | #NA | #NA | #N/A |
| PKLR | 486 | R | L | DV | 0.6 | 0.83 | #NA | 0.00 | -4.99 | 23.10 | 2 | 16704447 | CM061899 | DM | #NA | #NA | #NA | #N/A |
| PKLR | 107 | M | T | DV | 1 | 0.66 | #NA | 0.00 | -5.29 | 35.00 | 2 | 7655861 | CM950941 | DM | #NA | #NA | #NA | #N/A |
| PKLR | 163 | R | C | DV | 1 | 1.00 | #NA | 0.00 | -6.97 | 25.80 | 3 | 2018831 | CM910299 | DM | Pathogenic | #NA | #NA | #N/A |
| PKLR | 406 | G | R | DV | 1 | 1.00 | #NA | 0.00 | -7.44 | 23.00 | 3 | 18759866 | CM090467 | DM | #NA | #NA | #NA | #N/A |
| PKLR | 410 | K | E | DV | 1 | 0.74 | #NA | 0.00 | -3.74 | 22.10 | 3 | 16704447 | CM061894 | DM | #NA | #NA | #NA | #N/A |
| PKLR | 479 | R | C | DV | 0.8 | 0.92 | #NA | 0.00 | -6.25 | 22.50 | 1 | NA | HM080075 | DM | #NA | #NA | #NA | #N/A |
| PKLR | 426 | R | W | DV | 0.8 | 0.98 | #NA | 0.00 | -5.55 | 22.20 | 1 | 7655861 | CM950955 | DM | #NA | #NA | #NA | #N/A |
| PKLR | 479 | R | H | DV | 1 | 0.78 | #NA | 0.04 | -3.21 | 22.50 | 1 | 8161798 | CM941168 | DM | Pathogenic | #NA | #NA | #N/A |
| PKLR | 163 | R | L | DV | 1 | 0.99 | #NA | 0.00 | -6.09 | 17.54 | 3 | 19085939 | CM091408 | DM | #NA | #NA | #NA | #N/A |
| PKLR | 337 | R | Q | DV | 1 | 1.00 | #NA | 0.00 | -3.81 | 19.07 | 3 | 9057665 | CM971209 | DM | #NA | #NA | #NA | #N/A |
| PKLR | 275 | G | R | DV | 1 | 1.00 | #NA | 0.00 | -6.95 | 19.72 | 3 | 7655861 | CM950947 | DM | #NA | #NA | #NA | uncertain |
| PKLR | 331 | D | E | DV | 0.8 | 1.00 | #NA | 0.00 | -3.74 | 18.04 | 3 | 7706479 | CM950949 | DM | #NA | #NA | #NA | #N/A |
| PKLR | 421 | Q | K | DV | 1 | 0.95 | #NA | 0.02 | -2.15 | 21.20 | 1 | 1536957 | CM920579 | DM | Pathogenic | #NA | #NA | uncertain |
| PKLR | 359 | R | C | DV | 0.8 | 1.00 | #NA | 0.00 | -7.06 | 23.10 | 2 | 8579052 | CM950952 | DM | #NA | #NA | #NA | #N/A |
| PKLR | 468 | A | G | DV | 1 | 0.67 | #NA | 0.01 | -3.25 | 16.48 | 3 | 10087985 | CM981574 | DM | #NA | #NA | #NA | #N/A |
| PKLR | 281 | D | N | DV | 1 | 0.63 | #NA | 0.00 | -4.60 | 20.50 | 1 | 8579052 | CM950948 | DM | #NA | #NA | #NA | #N/A |
| PKLR | 341 | G | D | DV | 1 | 1.00 | #NA | 0.00 | -6.53 | 23.10 | 3 | 9657767 | CM981563 | DM | #NA | #NA | #NA | causal |
| PKLR | 360 | C | Y | DV | 1 | 0.85 | #NA | 0.00 | -10.65 | 22.80 | 1 | 16704447 | CM061905 | DM | #NA | #NA | #NA | #N/A |
| PKLR | 460 | V | M | DV | 0.6 | 0.99 | #NA | 0.00 | -2.49 | 22.60 | 3 | 7706479 | CM950957 | DM | #NA | #NA | #NA | #N/A |
| RPIA | 135 | A | V | DV | 1 | 1.00 | 1.00 | 0.00 | -3.85 | 23.00 | 2 | 14988808 | CM041828 | DM | Pathogenic | #NA | #NA | #N/A |
| TECR | 182 | P | L | DV | 1 | 1.00 | 0.97 | 0.00 | -8.82 | 20.00 | 1 | 21212097 | CM111494 | DM | Pathogenic | #NA | #NA | #N/A |
| TPK1 | 219 | N | S | DV | 0.8 | 0.99 | 0.25 | 0.00 | -4.55 | 26.30 | 3 | 22152682 | CM1110069 | DM | Pathogenic | 0.000016 | #NA | causal |
| TPK1 | 50 | N | H | DV | 0.8 | 1.00 | 0.13 | 0.03 | -3.42 | 24.40 | 3 | 22152682 | CM1110066 | DM | Pathogenic | #NA | #NA | #N/A |
| TPK1 | 40 | L | P | DV | 0.8 | 0.55 | 0.31 | 0.28 | -2.59 | 10.47 | 3 | 22152682 | CM1110068 | DM | Pathogenic | 0.000008 | #NA | causal |
| UROS | 69 | A | T | DV | 1 | 0.99 | 0.48 | 0.38 | -3.62 | 23.00 | 2 | 12060141 | CM021711 | DM | #NA | #NA | #NA | #N/A |
| UROS | 188 | G | R | DV | 1 | 1.00 | 0.75 | 0.37 | -3.48 | 26.80 | 0 | 9834209 | CM983353 | DM | Pathogenic | #NA | #NA | causal |
| UROS | 237 | L | P | DV | 1 | 1.00 | 0.63 | 0.01 | -4.10 | 32.00 | 2 | 17298225 | CM067487 | DM | #NA | 0.000010 | #NA | #N/A |
| UROS | 53 | P | L | DV | 1 | 1.00 | 0.86 | 0.36 | -7.86 | 21.50 | 0 | 2331520 | CM900224 | DM | Pathogenic | #NA | #NA | #N/A |
| UROS | 3 | V | F | DV | 1 | 0.98 | 1.16 | 0.13 | -3.80 | 21.40 | 3 | 9188670 | CM971563 | DM | #NA | 0.000016 | #NA | causal |
| UROS | 104 | A | V | DV | 1 | 0.80 | 0.85 | 0.05 | -2.50 | 17.97 | 3 | 7860775 | CM951265 | DM | Pathogenic | #NA | #NA | #N/A |
| UROS | 173 | H | Y | DV | 1 | 0.99 | 0.82 | 0.19 | -4.06 | 17.96 | 3 | 8946173 | CM961410 | DM | #NA | #NA | #NA | #N/A |
| UROS | 188 | G | W | DV | 1 | 1.00 | 1.00 | 0.00 | -4.47 | 26.80 | 0 | 12060141 | CM021712 | DM | Pathogenic | #NA | #NA | #N/A |
| UROS | 228 | T | M | DV | 1 | 1.00 | 0.33 | 0.00 | -5.38 | 35.00 | 3 | 1737856 | CM920707 | DM | Pathogenic | 0.000027 | #NA | #N/A |
| UROS | 212 | S | P | DV | 0.8 | 0.18 | 0.34 | 0.29 | -1.28 | 27.40 | 1 | 8655129 | CM961412 | DM | #NA | 0.000008 | #NA | #N/A |
| UROS | 219 | I | S | DV | 1 | 1.00 | 0.87 | 0.27 | -3.03 | 14.18 | 2 | 12060141 | CM021713 | DM | #NA | 0.000017 | #NA | #N/A |
| UROS | 187 | Q | P | DV | 1 | 0.94 | 1.00 | 0.23 | -2.76 | 25.70 | 1 | 8946173 | CM961411 | DM | #NA | #NA | #NA | #N/A |
| UROS | 225 | G | S | DV | 0.8 | 1.00 | 0.03 | 0.00 | -5.39 | 25.90 | 3 | 7860775 | CM951266 | DM | Pathogenic | 0.000053 | #NA | #N/A |
| UROS | 47 | S | P | DV | 0.8 | 0.91 | 1.00 | 0.31 | -2.22 | 22.70 | 1 | 15304101 | CM042498 | DM | Pathogenic | #NA | #NA | causal |
| UROS | 66 | A | V | DV | 0.8 | 0.65 | 1.20 | 0.00 | -3.09 | 23.00 | 1 | 1737856 | CM920706 | DM | Pathogenic | #NA | #NA | #N/A |
| UROS | 236 | G | V | DV | 1 | 1.00 | 0.75 | 0.00 | -7.21 | 32.00 | 1 | 17298225 | CM067488 | DM | #NA | #NA | #NA | #N/A |
| UROS | 58 | G | R | DV | 1 | 1.00 | 0.65 | 0.32 | -7.77 | 22.90 | 0 | 22816431 | CM128678 | DM | #NA | #NA | #NA | #N/A |
| UROS | 99 | V | A | DV | 1 | 1.00 | 0.77 | 0.00 | -3.55 | 21.60 | 3 | 7860775 | CM951264 | DM | #NA | #NA | #NA | #N/A |
| UROS | 62 | T | A | DV | 1 | 0.94 | 0.72 | 0.06 | -4.50 | 23.10 | 3 | 1737856 | CM920705 | DM | Pathogenic | 0.000008 | #NA | #N/A |
| UROS | 4 | L | F | DV | 1 | 0.99 | 0.97 | 0.08 | -2.95 | 22.90 | 3 | 1733834 | CM920704 | DM | Pathogenic | 0.000025 | #NA | #N/A |
| YARS | 41 | G | R | DV | 1 | 1.00 | 2.15 | 0.00 | -7.06 | 26.80 | 3 | 16429158 | CM060508 | DM | Pathogenic | #NA | #NA | #N/A |
| YARS | 196 | E | K | DV | 1 | 0.99 | 0.78 | 0.20 | -3.42 | 34.00 | 3 | 16429158 | CM060507 | DM | Pathogenic | #NA | #NA | causal |
| TPK1 | 223 | G | R | DV | 0.8 | 0.80 | 0.28 | 0.26 | -3.42 | 22.60 | 3 | 22495306 | CM124510 | DM? | #NA | 0.000058 | #NA | #N/A |
| GFPT2 | 471 | I | V | DV | 0 | 0.01 | 0.03 | 0.04 | -0.79 | 22.90 | 3 | 14764791 | CM040423 | DP | #NA | 0.339600 | 0.228000 | #N/A |
| CMPK1 | 83 | N | S | DV | 0 | 0.00 | 0.13 | 0.01 | -0.77 | 18.36 | 3 | 18556440 | CM086307 | FP | #NA | 0.006451 | #NA | #N/A |
| FTFD1 | 45 | K | R | DV | 0 | 0.00 | -0.14 | 0.10 | -0.20 | 21.90 | 1 | 18350552 | CM081612 | FP | #NA | 0.067980 | 0.037000 | #N/A |
| CALM1 | 42 | Q | L | NV | 0 | 0.07 | 0.02 | 0.18 | -5.88 | 22.90 | 1 | #NA | rs199897752 | #NA | #NA | #NA | #NA | #N/A |
| CALM1 | 50 | Q | R | NV | 0 | 0.02 | 0.02 | 0.22 | -3.20 | 22.60 | 1 | #NA | rs202194260 | #NA | #NA | #NA | #NA | #N/A |
| CMPK1 | 58 | E | K | NV | 0 | 0.01 | 0.14 | 0.01 | -0.45 | 25.80 | 1 | #NA | rs72553946 | #NA | #NA | 0.003541 | 0.006000 | #N/A |
| DHFR | 63 | E | Q | NV | 0.6 | 0.29 | 0.23 | 0.23 | -2.38 | 21.90 | 1 | #NA | rs200232379 | #NA | #NA | #NA | #NA | #N/A |
| DHFR | 140 | M | L | NV | 0 | 0.00 | -0.21 | 0.75 | -1.15 | 22.50 | 3 | #NA | rs141831067 | #NA | #NA | 0.000555 | 0.001400 | #N/A |
| DPAGT1 | 393 | I | V | NV | 0 | 0.00 | -0.09 | 0.61 | -0.36 | 1.33 | 0 | #NA | rs643788 | #NA | #NA | 0.421500 | 0.430200 | #N/A |
| DPAGT1 | 137 | L | F | NV | 0 | 1.00 | 0.06 | 0.00 | -3.87 | 23.00 | 3 | #NA | rs202188944 | #NA | #NA | #NA | 0.000500 | #N/A |
| DPAGT1 | 37 | I | L | NV | 0 | 0.00 | 0.03 | 0.29 | -0.99 | 23.10 | 3 | #NA | rs201932882 | #NA | #NA | #NA | 0.000500 | #N/A |
| DPAGT1 | 371 | L | F | NV | 0 | 0.00 | 0.21 | 1.00 | -1.01 | 13.17 | 1 | #NA | rs139295058 | #NA | #NA | 0.000008 | 0.000500 | #N/A |
| DPAGT1 | 401 | L | F | NV | 0 | 0.18 | -0.10 | 0.02 | -2.40 | 21.70 | 0 | #NA | rs150532554 | #NA | #NA | 0.000050 | #NA | #N/A |
| DPAGT1 | 376 | E | D | NV | 0 | 1.00 | -0.07 | 0.00 | -2.91 | 20.10 | 3 | #NA | rs200747570 | #NA | #NA | #NA | 0.000200 | #N/A |
| DPAGT1 | 332 | F | V | NV | 0 | 0.00 | 0.12 | 0.37 | -0.21 | 18.21 | 1 | #NA | rs138544311 | #NA | #NA | 0.001087 | 0.000600 | #N/A |
| DPAGT1 | 70 | L | F | NV | 0.8 | 0.66 | 0.46 | 0.01 | -2.28 | 22.90 | 2 | #NA | rs190620777 | #NA | #NA | #NA | 0.000200 | #N/A |
| DPAGT1 | 116 | D | E | NV | 0 | 1.00 | 0.08 | 0.00 | -3.87 | 21.10 | 3 | #NA | rs200885014 | #NA | #NA | 0.000008 | #NA | #N/A |
| EMG1 | 214 | E | G | NV | 0 | 0.96 | -0.08 | #N/A | -6.39 | 22.60 | 2 | #NA | rs200470095 | #NA | #NA | 0.000058 | #NA | #N/A |
| FTFD1 | 356 | S | C | NV | 0 | 0.77 | -0.21 | 0.14 | -0.91 | 8.03 | 0 | #NA | rs79708434 | #NA | #NA | 0.001772 | 0.007800 | #N/A |
| GDI1 | 63 | P | S | NV | 0 | 0.05 | -0.07 | 0.06 | -2.80 | 23.00 | 0 | #NA | rs199816411 | #NA | #NA | 0.000023 | 0.000600 | #N/A |
| GDI1 | 256 | D | Y | NV | 0.6 | 0.89 | 0.54 | 0.00 | -5.69 | 22.60 | 3 | 18487148 | rs11549300 | #NA | #NA | 0.000011 | #NA | #N/A |
| GFPT2 | 430 | T | I | NV | 0 | 1.00 | -0.09 | 0.00 | -5.38 | 10.71 | 3 | #NA | rs201795453 | #NA | #NA | #NA | 0.000500 | #N/A |
| GLUL | 80 | V | M | NV | 0 | 0.05 | 0.00 | 0.14 | 0.17 | 12.88 | 1 | #NA | rs151138433 | #NA | #NA | 0.000033 | #NA | #N/A |
| GLUL | 116 | T | I | NV | 0 | 0.19 | 0.00 | 0.16 | -3.12 | 23.10 | 1 | #NA | rs144782603 | #NA | #NA | 0.000313 | #NA | #N/A |
| NCS1 | 61 | R | Q | NV | 0 | 0.01 | -0.07 | 0.26 | -0.28 | 23.00 | 1 | #NA | rs200938140 | #NA | #NA | #NA | 0.000500 | #N/A |
| NHP2 | 118 | A | T | NV | 0 | 0.01 | 0.05 | 0.42 | -0.99 | 17.22 | 1 | #NA | rs139588879 | #NA | #NA | 0.001051 | 0.000500 | #N/A |
| NHP2 | 101 | R | Q | NV | 0 | 0.01 | -0.01 | 0.06 | -1.05 | 16.70 | 1 | #NA | rs145890370 | #NA | #NA | 0.004613 | 0.002800 | #N/A |
| NSDHL | 9 | M | L | NV | 0 | 0.00 | 0.35 | 0.80 | -0.32 | 0.00 | 0 | #NA | rs35529894 | #NA | #NA | 0.005017 | 0.003600 | #N/A |
| NSDHL | 95 | L | V | NV | 0 | 0.20 | 0.04 | 0.18 | -1.43 | 23.40 | 0 | #NA | rs138562213 | #NA | #NA | 0.000148 | 0.000600 | #N/A |
| NSDHL | 298 | W | L | NV | 0 | 0.00 | -0.28 | 0.65 | -1.27 | 17.51 | 0 | #NA | rs139186585 | #NA | #NA | 0.000399 | 0.001200 | #N/A |
| NSDHL | 281 | R | C | NV | 0 | 0.95 | 0.00 | 0.17 | -2.30 | 32.00 | 3 | #NA | rs146686014 | #NA | #NA | 0.000389 | #NA | #N/A |
| NSDHL | 14 | A | V | NV | 0 | 0.01 | 0.28 | 0.03 | 0.09 | 10.11 | 0 | #NA | rs141007145 | #NA | #NA | 0.000011 | #NA | #N/A |
| NSDHL | 253 | Q | K | NV | 0 | 0.00 | 0.30 | 1.00 | 0.35 | 9.33 | 2 | #NA | rs141571609 | #NA | #NA | 0.000023 | #NA | #N/A |
| NSDHL | 89 | Q | E | NV | 0 | 0.01 | 0.10 | 1.00 | 0.03 | 2.07 | 1 | #NA | rs145580873 | #NA | #NA | 0.000023 | #NA | #N/A |
| PGK1 | 119 | L | P | NV | 0 | 0.99 | -0.06 | 0.00 | -6.80 | 26.70 | 3 | #NA | rs200351737 | #NA | #NA | 0.000615 | 0.001200 | #N/A |
| PGK1 | 163 | N | S | NV | 0 | 0.18 | 0.10 | 0.02 | -4.62 | 23.30 | 3 | #NA | rs185071030 | #NA | #NA | 0.000023 | #NA | #N/A |
| PGK1 | 350 | R | W | NV | 0 | 0.00 | 0.03 | 0.00 | -2.51 | 19.30 | 1 | #NA | rs183087139 | #NA | #NA | 0.000171 | 0.003600 | #N/A |
| PGK1 | 398 | A | T | NV | 0 | 0.86 | -0.01 | 0.01 | -3.47 | 21.90 | 3 | #NA | rs199644680 | #NA | #NA | 0.000046 | #NA | #N/A |
| PGK1 | 57 | S | L | NV | 0 | 0.95 | 0.06 | 0.00 | -4.52 | 33.00 | 1 | #NA | rs200132648 | #NA | #NA | 0.000082 | #NA | #N/A |
| PGK1 | 305 | S | C | NV | 0 | 0.58 | 0.07 | 0.01 | -3.99 | 11.34 | 1 | #NA | rs200778983 | #NA | #NA | 0.000040 | #NA | #N/A |
| PIN1 | 142 | R | Q | NV | 0 | 0.01 | 0.09 | 0.37 | -0.63 | 20.40 | 2 | #NA | rs141688544 | #NA | #NA | 0.000146 | #NA | #N/A |
| PKLR | 569 | R | Q | NV | 0 | 0.43 | #NA | 0.03 | -3.43 | 22.20 | 2 | #NA | rs61755431 | #NA | #NA | 0.000988 | 0.001400 | #N/A |
| PKLR | 277 | E | K | NV | 0 | 0.78 | #NA | 0.04 | -3.11 | 17.78 | 2 | #NA | rs147689373 | #NA | #NA | 0.000747 | 0.001800 | #N/A |
| PKLR | 460 | V | A | NV | 0 | 0.95 | #NA | 0.05 | -3.06 | 15.38 | 3 | #NA | rs149946271 | #NA | #NA | 0.000239 | 0.001400 | #N/A |
| PKLR | 504 | R | L | NV | 0.6 | 0.68 | #NA | 0.00 | -6.55 | 23.00 | 3 | #NA | rs185753709 | #NA | #NA | 0.000008 | 0.000200 | #N/A |
| PKLR | 549 | G | R | NV | 0 | 0.99 | #NA | 0.00 | -6.31 | 22.90 | 3 | #NA | rs190966689 | #NA | #NA | 0.000008 | 0.000200 | #N/A |
| PKLR | 219 | I | T | NV | 0 | 0.71 | #NA | 0.00 | -3.54 | 26.60 | 3 | #NA | rs200572803 | #NA | #NA | 0.000133 | #NA | #N/A |
| PKLR | 213 | V | A | NV | 0 | 0.25 | #NA | 0.12 | -2.06 | 14.33 | 2 | #NA | rs200979497 | #NA | #NA | 0.000075 | 0.000200 | #N/A |
| PKLR | 479 | R | C | NV | 0 | 0.92 | #NA | 0.00 | -6.25 | 22.50 | 1 | #NA | rs201406712 | #NA | #NA | 0.000025 | 0.000400 | #N/A |
| PKLR | 506 | V | I | NV | 0 | 0.00 | #NA | 0.01 | -0.34 | 22.70 | 1 | #NA | rs8177988 | #NA | #NA | 0.004196 | 0.002200 | #N/A |
| PKLR | 306 | H | Q | NV | 0.6 | 0.00 | #NA | 0.18 | 1.47 | 13.84 | 1 | #NA | rs141571402 | #NA | #NA | 0.000066 | #NA | #N/A |
| PKLR | 449 | R | C | NV | 0 | 0.00 | #NA | 0.07 | -1.48 | 22.90 | 1 | #NA | rs189360283 | #NA | #NA | 0.000025 | 0.000200 | #N/A |
| PKLR | 209 | R | Q | NV | 0.6 | 0.00 | #NA | 0.10 | -1.19 | 22.80 | 2 | #NA | rs200480300 | #NA | #NA | 0.000017 | 0.000400 | #N/A |
| PKLR | 538 | E | D | NV | 0 | 0.00 | #NA | 0.46 | -0.71 | 22.10 | 3 | #NA | rs201217064 | #NA | #NA | 0.000379 | 0.000200 | #N/A |
| PKLR | 303 | P | A | NV | 0 | 0.00 | #NA | 0.04 | -1.31 | 20.30 | 1 | #NA | rs201979697 | #NA | #NA | 0.000050 | 0.000200 | #N/A |
| PKLR | 518 | R | C | NV | 0 | 0.44 | #NA | 0.00 | -2.98 | 22.30 | 1 | #NA | rs139002629 | #NA | #NA | 0.000552 | #NA | #N/A |
| PKLR | 260 | D | N | NV | 0 | 0.96 | #NA | 0.00 | -4.38 | 23.10 | 3 | #NA | rs140575553 | #NA | #NA | 0.000008 | 0.000200 | #N/A |
| PKLR | 273 | R | H | NV | 0 | 0.02 | #NA | 0.01 | -2.00 | 19.09 | 3 | #NA | rs141393570 | #NA | #NA | 0.000025 | 0.000400 | #N/A |
| PKLR | 99 | R | C | NV | 0 | 0.15 | #NA | 0.01 | -5.52 | 36.00 | 1 | #NA | rs148636159 | #NA | #NA | 0.000017 | #NA | #N/A |
| PKLR | 490 | R | W | NV | 0 | 1.00 | #NA | 0.00 | -6.82 | 22.70 | 1 | #NA | rs200133000 | #NA | #NA | 0.000149 | 0.000200 | #N/A |
| RPIA | 266 | H | Y | NV | 0.6 | 0.00 | 0.44 | 0.09 | #N/A | 19.91 | 1 | #NA | rs147431137 | #NA | #NA | 0.000157 | 0.000900 | #N/A |
| TECR | 79 | R | W | NV | 0 | 0.72 | -0.06 | 0.00 | -5.13 | 22.70 | 2 | #NA | rs200985373 | #NA | #NA | 0.000017 | 0.000500 | #N/A |
| TECR | 50 | L | I | NV | 0 | 0.02 | -0.12 | 0.25 | -1.07 | 22.70 | 1 | #NA | rs11539238 | #NA | #NA | 0.000110 | 0.000500 | #N/A |
| TPK1 | 57 | E | K | NV | 0 | 0.05 | 0.32 | 0.92 | -1.50 | 22.60 | 2 | #NA | rs200717734 | #NA | #NA | 0.000033 | #NA | #N/A |
| UBE2I | 58 | F | C | NV | 1 | 0.94 | 1.19 | 0.00 | -5.69 | 19.12 | 2 | #NA | rs200515482 | #NA | #NA | 0.000008 | 0.000500 | #N/A |
| UROS | 57 | G | R | NV | 0.6 | 1.00 | 0.61 | 0.32 | -3.35 | 22.60 | 0 | #NA | rs200322717 | #NA | #NA | #NA | #NA | #N/A |
| UROS | 103 | T | A | NV | 1 | 0.95 | 1.14 | 0.00 | -3.90 | 17.02 | 3 | #NA | rs187322901 | #NA | #NA | #NA | 0.000500 | #N/A |
| UROS | 171 | V | G | NV | 0 | 0.02 | 0.14 | 0.49 | -2.60 | 4.06 | 0 | #NA | rs17173752 | #NA | #NA | 0.011140 | 0.014200 | #N/A |
| UROS | 222 | A | V | NV | 0 | 0.01 | 0.57 | 0.25 | 0.41 | 8.48 | 3 | #NA | rs202091831 | #NA | #NA | 0.000009 | 0.000500 | #N/A |
| UROS | 165 | I | V | NV | 0 | 0.01 | 0.14 | 0.83 | -0.49 | 0.00 | 2 | #NA | rs143536058 | #NA | #NA | 0.000099 | 0.000500 | #N/A |
| UROS | 113 | D | V | NV | 0 | 0.00 | -0.43 | 0.31 | -1.35 | 16.29 | 1 | #NA | rs117926090 | #NA | #NA | 0.009227 | 0.000900 | #N/A |
| UROS | 261 | P | A | NV | 0 | 0.00 | -0.15 | 0.65 | -0.91 | 4.09 | 1 | #NA | rs148538627 | #NA | #NA | 0.000072 | #NA | #N/A |
| UROS | 206 | K | E | NV | 0 | 0.00 | 0.17 | 1.00 | 0.47 | 1.94 | 3 | #NA | rs199521454 | #NA | #NA | 0.000008 | #NA | #N/A |
| UROS | 234 | A | T | NV | 0 | 0.04 | -0.18 | 0.14 | -0.38 | 21.50 | 1 | #NA | rs143947596 | #NA | #NA | 0.000375 | 0.000400 | #N/A |
| UROS | 247 | T | M | NV | 0 | 0.94 | 0.51 | 0.00 | -3.36 | 28.90 | 1 | #NA | rs199925121 | #NA | #NA | 0.000665 | 0.000400 | #N/A |
| UROS | 263 | G | S | NV | 0 | 0.00 | -0.03 | 0.61 | 0.46 | 6.04 | 1 | #NA | rs143997563 | #NA | #NA | 0.000132 | #NA | #N/A |
| UROS | 264 | C | F | NV | 0 | 0.15 | 0.18 | 0.02 | -1.30 | 12.75 | 0 | #NA | rs201139760 | #NA | #NA | 0.000085 | 0.000200 | #N/A |
| UROS | 124 | K | R | NV | 0 | 0.49 | -0.66 | 0.53 | -1.10 | 19.44 | 1 | #NA | rs17153561 | #NA | #NA | 0.000008 | #NA | #N/A |
| UROS | 36 | L | V | NV | 0 | 0.81 | -0.08 | 0.05 | -2.63 | 21.20 | 2 | #NA | rs200858139 | #NA | #NA | 0.000049 | 0.000400 | #N/A |
| YARS | 431 | M | L | NV | 0 | 0.00 | 0.14 | 0.16 | -1.57 | 23.00 | 0 | #NA | rs149620809 | #NA | #NA | 0.000395 | 0.001800 | #N/A |
| YARS | 339 | A | T | NV | 0 | 0.00 | -0.26 | 0.31 | -0.49 | 23.40 | 1 | #NA | rs141323599 | #NA | #NA | 0.003023 | 0.001400 | #N/A |

*DV: disease-associated mutations; NV: non-disease-associated mutations

**Classifier probability of the variation being damaging (pph2_prob) was used as Polyphen2 score

***Residues with alignment scores 0 or 1 were annotated as "non-conserved"; residues with alignment scores 2 or 3 were annotated as "conserved"

**** DM = Disease causing (pathological) mutation; DM? = Likely disease causing (likely pathological) mutation; DP = Disease associated polymorphism; DFP = Disease associated polymorphism with additional supporting functional evidence; FP = Polymorphism affecting the structure, function or expression of a gene but with no disease association reported yet

**Supplemental Table S4. Relative growth rates and FCT scores.**

| Gene | aa pos | wt | mut | annotation | temperature | relative growth rate | | | FCT score |
| --- | --- | --- | --- | --- | --- | --- | --- | --- | --- |
| measurement 1 | measurement 2 | average |
| CALM1 | #NA | #NA | #NA | wt | 38°C | 1.00 | 1.00 | 1.00 | 0.00 |
| CALM1 | #NA | #NA | #NA | GFP | 38°C | 0.00 | 0.00 | 0.00 | 1.00 |
| CALM1 | 98 | N | S | DM | 38°C | 0.26 | 0.18 | 0.22 | 0.78 |
| CALM1 | 53 | I | N | DM | 38°C | 0.87 | 0.94 | 0.90 | 0.10 |
| CALM1 | 90 | F | L | DM | 38°C | 0.64 | 0.79 | 0.71 | 0.29 |
| CALM1 | 130 | D | G | DM | 38°C | 0.78 | 0.81 | 0.80 | 0.20 |
| CALM1 | 142 | F | L | DM | 38°C | 0.69 | 0.74 | 0.72 | 0.28 |
| CALM1 | 42 | Q | L | NV | 38°C | 1.01 | 0.95 | 0.98 | 0.02 |
| CALM1 | 50 | Q | R | NV | 38°C | 0.95 | 1.00 | 0.98 | 0.02 |
| CMPK1 | #NA | #NA | #NA | wt | 38°C | 1.00 | 1.00 | 1.00 | 0.00 |
| CMPK1 | #NA | #NA | #NA | GFP | 38°C | 0.43 | 0.42 | 0.42 | 1.00 |
| CMPK1 | 115 | N | S | DM | 38°C | 0.94 | 0.91 | 0.93 | 0.13 |
| CMPK1 | 107 | E | K | NV | 38°C | 0.93 | 0.91 | 0.92 | 0.14 |
| DHDDS | #NA | #NA | #NA | wt | 38°C | 1.00 | 1.00 | 1.00 | 0.00 |
| DHDDS | #NA | #NA | #NA | GFP | 38°C | 0.37 | 0.40 | 0.38 | 1.00 |
| DHDDS | 42 | K | E | DM | 38°C | 1.02 | 1.01 | 1.01 | -0.02 |
| DHFR | #NA | #NA | #NA | wt | 38°C | 1.00 | 1.00 | 1.00 | 0.00 |
| DHFR | #NA | #NA | #NA | GFP | 38°C | 0.39 | 0.37 | 0.38 | 1.00 |
| DHFR | 80 | L | F | DM | 38°C | 1.01 | 0.89 | 0.95 | 0.09 |
| DHFR | 153 | D | V | DM | 38°C | 0.46 | 0.43 | 0.44 | 0.90 |
| DHFR | 63 | E | Q | NV | 38°C | 0.82 | 0.89 | 0.85 | 0.23 |
| DHFR | 140 | M | L | NV | 38°C | 1.11 | 1.15 | 1.13 | -0.21 |
| DPAGT1 | #NA | #NA | #NA | wt | 38°C | 1.00 | 1.00 | 1.00 | 0.00 |
| DPAGT1 | #NA | #NA | #NA | GFP | 38°C | 0.41 | 0.39 | 0.40 | 1.00 |
| DPAGT1 | 170 | Y | C | DM | 38°C | 0.94 | 0.95 | 0.94 | 0.10 |
| DPAGT1 | 69 | I | N | DM | 38°C | 0.93 | 0.98 | 0.96 | 0.07 |
| DPAGT1 | 108 | M | I | DM | 38°C | 1.03 | 1.00 | 1.02 | -0.03 |
| DPAGT1 | 29 | I | F | DM | 38°C | 0.65 | 0.69 | 0.67 | 0.54 |
| DPAGT1 | 297 | I | F | DM | 38°C | 0.75 | 0.88 | 0.81 | 0.31 |
| DPAGT1 | 301 | R | H | DM | 38°C | 0.81 | 0.88 | 0.84 | 0.26 |
| DPAGT1 | 385 | L | R | DM | 38°C | 0.93 | 1.03 | 0.98 | 0.04 |
| DPAGT1 | 114 | A | G | DM | 38°C | 0.96 | 1.00 | 0.98 | 0.03 |
| DPAGT1 | 160 | G | S | DM | 38°C | 0.79 | 0.94 | 0.86 | 0.23 |
| DPAGT1 | 137 | L | F | NV | 38°C | 0.99 | 0.94 | 0.96 | 0.06 |
| DPAGT1 | 37 | I | L | NV | 38°C | 0.96 | 1.01 | 0.98 | 0.03 |
| DPAGT1 | 393 | I | V | NV | 38°C | 1.05 | 1.06 | 1.05 | -0.09 |
| DPAGT1 | 371 | L | F | NV | 38°C | 0.84 | 0.90 | 0.87 | 0.21 |
| DPAGT1 | 401 | L | F | NV | 38°C | 1.10 | 1.02 | 1.06 | -0.10 |
| DPAGT1 | 376 | E | D | NV | 38°C | 1.04 | 1.04 | 1.04 | -0.07 |
| DPAGT1 | 332 | F | V | NV | 38°C | 0.93 | 0.92 | 0.93 | 0.12 |
| DPAGT1 | 70 | L | F | NV | 38°C | 0.70 | 0.74 | 0.72 | 0.46 |
| DPAGT1 | 116 | D | E | NV | 38°C | 0.97 | 0.93 | 0.95 | 0.08 |
| EMG1 | #NA | #NA | #NA | wt | 38°C | 1.00 | 1.00 | 1.00 | 0.00 |
| EMG1 | #NA | #NA | #NA | GFP | 38°C | 0.83 | 0.75 | 0.79 | 1.00 |
| EMG1 | 86 | D | G | DM | 38°C | 0.73 | 0.83 | 0.78 | 1.04 |
| EMG1 | 214 | E | G | NV | 38°C | 0.98 | 1.05 | 1.02 | -0.08 |
| FTFD1 | #NA | #NA | #NA | wt | 38°C | 1.00 | 1.00 | 1.00 | 0.00 |
| FTFD1 | #NA | #NA | #NA | GFP | 38°C | 0.39 | 0.37 | 0.38 | 1.00 |
| FTFD1 | 45 | K | R | FP | 38°C | 1.22 | 0.96 | 1.09 | -0.14 |
| FTFD1 | 356 | S | C | NV | 38°C | 1.17 | 1.08 | 1.13 | -0.21 |
| GDI1 | #NA | #NA | #NA | wt | 38°C | 1.00 | 1.00 | 1.00 | 0.00 |
| GDI1 | #NA | #NA | #NA | GFP | 38°C | 0.11 | 0.13 | 0.12 | 1.00 |
| GDI1 | 92 | L | P | DM | 38°C | 0.24 | 0.20 | 0.22 | 0.89 |
| GDI1 | 423 | R | P | DM | 38°C | 0.36 | 0.36 | 0.36 | 0.73 |
| GDI1 | 63 | P | S | NV | 38°C | 1.05 | 1.07 | 1.06 | -0.07 |
| GDI1 | 256 | D | Y | NV | 38°C | 0.54 | 0.51 | 0.53 | 0.54 |
| GFPT2 | #NA | #NA | #NA | wt | 38°C | 1.00 | 1.00 | 1.00 | 0.00 |
| GFPT2 | #NA | #NA | #NA | GFP | 38°C | 0.61 | 0.59 | 0.60 | 1.00 |
| GFPT2 | 471 | I | V | DP | 38°C | 0.98 | 1.00 | 0.99 | 0.03 |
| GFPT2 | 430 | T | I | NV | 38°C | 1.06 | 1.02 | 1.04 | -0.09 |
| GLUL | #NA | #NA | #NA | wt | 38°C | 1.00 | 1.00 | 1.00 | 0.00 |
| GLUL | #NA | #NA | #NA | GFP | 38°C | 0.22 | 0.21 | 0.22 | 1.00 |
| GLUL | 324 | R | C | DM | 38°C | 0.66 | 0.65 | 0.65 | 0.44 |
| GLUL | 341 | R | C | DM | 38°C | 0.19 | 0.22 | 0.20 | 1.02 |
| GLUL | 80 | V | M | NV | 38°C | 1.04 | 0.96 | 1.00 | 0.00 |
| GLUL | 116 | T | I | NV | 38°C | 1.02 | 0.98 | 1.00 | 0.00 |
| NCS1 | #NA | #NA | #NA | wt | 38°C | 1.00 | 1.00 | 1.00 | 0.00 |
| NCS1 | #NA | #NA | #NA | GFP | 38°C | 0.38 | 0.56 | 0.47 | 1.00 |
| NCS1 | 102 | R | Q | DM | 38°C | 1.05 | 1.48 | 1.26 | -0.50 |
| NCS1 | 79 | R | Q | NV | 38°C | 1.07 | 1.00 | 1.04 | -0.07 |
| NHP2 | #NA | #NA | #NA | wt | 38°C | 1.00 | 1.00 | 1.00 | 0.00 |
| NHP2 | #NA | #NA | #NA | GFP | 38°C | 0.38 | 0.41 | 0.39 | 1.00 |
| NHP2 | 126 | V | M | DM | 38°C | 0.69 | 0.78 | 0.73 | 0.44 |
| NHP2 | 139 | Y | H | DM | 38°C | 0.65 | 0.75 | 0.70 | 0.49 |
| NHP2 | 118 | A | T | NV | 38°C | 0.97 | 0.97 | 0.97 | 0.05 |
| NHP2 | 101 | R | Q | NV | 38°C | 0.98 | 1.03 | 1.00 | -0.01 |
| NSDHL | #NA | #NA | #NA | wt | 36°C | 1.00 | 1.00 | 1.00 | 0.00 |
| NSDHL | #NA | #NA | #NA | GFP | 36°C | 0.96 | 0.58 | 0.77 | 1.00 |
| NSDHL | 105 | A | V | DM | 36°C | 0.87 | 0.87 | 0.87 | 0.59 |
| NSDHL | 205 | G | S | DM | 36°C | 0.90 | 0.67 | 0.79 | 0.94 |
| NSDHL | 340 | C | R | DM | 36°C | 0.87 | 0.52 | 0.70 | 1.34 |
| NSDHL | 147 | S | R | DM | 36°C | 0.92 | 0.54 | 0.73 | 1.20 |
| NSDHL | 349 | Y | H | DM | 36°C | 0.88 | 0.53 | 0.70 | 1.30 |
| NSDHL | 182 | A | P | DM | 36°C | 0.62 | 0.49 | 0.55 | 1.97 |
| NSDHL | 349 | Y | C | DM | 36°C | 0.70 | 0.55 | 0.63 | 1.64 |
| NSDHL | 132 | C | W | DM | 36°C | 1.01 | 0.61 | 0.81 | 0.84 |
| NSDHL | 124 | G | S | DM | 36°C | 0.77 | 0.65 | 0.71 | 1.29 |
| NSDHL | 9 | M | V | NV | 36°C | 1.00 | 0.84 | 0.92 | 0.35 |
| NSDHL | 95 | L | V | NV | 36°C | 1.12 | 0.86 | 0.99 | 0.04 |
| NSDHL | 298 | W | L | NV | 36°C | 1.27 | 1.10 | 1.19 | -0.82 |
| NSDHL | 281 | R | C | NV | 36°C | 1.12 | 1.01 | 1.06 | -0.28 |
| NSDHL | 14 | A | V | NV | 36°C | 0.95 | 0.93 | 0.94 | 0.28 |
| NSDHL | 253 | Q | K | NV | 36°C | 0.94 | 0.92 | 0.93 | 0.30 |
| NSDHL | 89 | Q | E | NV | 36°C | 1.00 | 0.95 | 0.98 | 0.10 |
| PGK1 | #NA | #NA | #NA | wt | 36°C | 1.00 | 1.00 | 1.00 | 0.00 |
| PGK1 | #NA | #NA | #NA | GFP | 36°C | 0.22 | 0.22 | 0.22 | 1.00 |
| PGK1 | 268 | D | N | DM | 36°C | 0.55 | 0.81 | 0.68 | 0.41 |
| PGK1 | 316 | C | R | DM | 36°C | 0.54 | 0.50 | 0.52 | 0.62 |
| PGK1 | 89 | L | P | DM | 36°C | 0.78 | 0.51 | 0.64 | 0.46 |
| PGK1 | 206 | R | P | DM | 36°C | 1.08 | 1.11 | 1.10 | -0.12 |
| PGK1 | 320 | S | N | DM | 36°C | 0.54 | 0.49 | 0.51 | 0.62 |
| PGK1 | 354 | A | P | DM | 36°C | 1.10 | 0.95 | 1.02 | -0.03 |
| PGK1 | 371 | I | K | DM | 36°C | 0.38 | 0.46 | 0.42 | 0.74 |
| PGK1 | 47 | I | N | DM | 36°C | 0.30 | 0.50 | 0.40 | 0.77 |
| PGK1 | 253 | I | T | DM | 36°C | 1.01 | 0.94 | 0.97 | 0.03 |
| PGK1 | 378 | T | P | DM | 36°C | 0.52 | 0.57 | 0.55 | 0.58 |
| PGK1 | 285 | D | V | DM | 36°C | 0.35 | 0.22 | 0.29 | 0.91 |
| PGK1 | 164 | D | V | DM | 36°C | 0.31 | 0.34 | 0.33 | 0.87 |
| PGK1 | 315 | D | N | DM | 36°C | 0.54 | 0.60 | 0.57 | 0.56 |
| PGK1 | 158 | G | V | DM | 36°C | 0.43 | 0.58 | 0.51 | 0.63 |
| PGK1 | 119 | L | P | NV | 36°C | 1.06 | 1.04 | 1.05 | -0.06 |
| PGK1 | 163 | N | S | NV | 36°C | 0.78 | 1.06 | 0.92 | 0.10 |
| PGK1 | 350 | R | W | NV | 36°C | 1.04 | 0.91 | 0.98 | 0.03 |
| PGK1 | 398 | A | T | NV | 36°C | 0.94 | 1.07 | 1.01 | -0.01 |
| PGK1 | 57 | S | L | NV | 36°C | 0.90 | 1.02 | 0.96 | 0.06 |
| PGK1 | 305 | S | C | NV | 36°C | 0.93 | 0.95 | 0.94 | 0.07 |
| PIN1 | #NA | #NA | #NA | wt | 38°C | 1.00 | 1.00 | 1.00 | 0.00 |
| PIN1 | #NA | #NA | #NA | GFP | 38°C | 0.65 | 0.71 | 0.68 | 1.00 |
| PIN1 | 32 | S | C | DM | 38°C | 0.80 | 0.44 | 0.62 | 1.19 |
| PIN1 | 142 | R | Q | NV | 38°C | 0.97 | 0.98 | 0.97 | 0.09 |
| PKLR | #NA | #NA | #NA | wt | 38°C | 1.00 | 1.00 | 1.00 | #NA |
| PKLR | #NA | #NA | #NA | GFP | 38°C | 0.96 | 0.98 | 0.97 | #NA |
| PKLR | 407 | E | G | DM | 38°C | 1.00 | 1.02 | 1.01 | #NA |
| PKLR | 486 | R | L | DM | 38°C | 0.90 | 0.92 | 0.91 | #NA |
| PKLR | 107 | M | T | DM | 38°C | 0.88 | 0.86 | 0.87 | #NA |
| PKLR | 163 | R | C | DM | 38°C | 0.86 | 0.81 | 0.83 | #NA |
| PKLR | 406 | G | R | DM | 38°C | 0.88 | 0.96 | 0.92 | #NA |
| PKLR | 410 | K | E | DM | 38°C | 0.98 | 0.98 | 0.98 | #NA |
| PKLR | 479 | R | C | DM | 38°C | 1.06 | 1.08 | 1.07 | #NA |
| PKLR | 426 | R | W | DM | 38°C | 0.74 | 0.67 | 0.70 | #NA |
| PKLR | 479 | R | H | DM | 38°C | 0.93 | 0.91 | 0.92 | #NA |
| PKLR | 163 | R | L | DM | 38°C | 0.83 | 0.81 | 0.82 | #NA |
| PKLR | 337 | R | Q | DM | 38°C | 0.85 | 0.81 | 0.83 | #NA |
| PKLR | 275 | G | R | DM | 38°C | 0.80 | 0.81 | 0.81 | #NA |
| PKLR | 331 | D | E | DM | 38°C | 0.89 | 0.92 | 0.90 | #NA |
| PKLR | 421 | Q | K | DM | 38°C | 0.95 | 0.99 | 0.97 | #NA |
| PKLR | 359 | R | C | DM | 38°C | 0.79 | 0.75 | 0.77 | #NA |
| PKLR | 468 | A | G | DM | 38°C | 0.99 | 1.04 | 1.01 | #NA |
| PKLR | 281 | D | N | DM | 38°C | 0.91 | 0.90 | 0.91 | #NA |
| PKLR | 341 | G | D | DM | 38°C | 0.92 | 0.89 | 0.90 | #NA |
| PKLR | 360 | C | Y | DM | 38°C | 0.87 | 0.80 | 0.83 | #NA |
| PKLR | 460 | V | M | DM | 38°C | 0.85 | 0.88 | 0.87 | #NA |
| PKLR | 569 | R | Q | NV | 38°C | 0.87 | 0.90 | 0.88 | #NA |
| PKLR | 277 | E | K | NV | 38°C | 0.87 | 0.92 | 0.90 | #NA |
| PKLR | 460 | V | A | NV | 38°C | 1.05 | 1.07 | 1.06 | #NA |
| RPIA | #NA | #NA | #NA | wt | 38°C | 1.00 | 1.00 | 1.00 | 0.00 |
| RPIA | #NA | #NA | #NA | GFP | 38°C | 0.00 | 0.00 | 0.00 | 1.00 |
| RPIA | 135 | A | V | DM | 38°C | 0.00 | 0.00 | 0.00 | 1.00 |
| RPIA | 192 | H | Y | NV | 38°C | 0.55 | 0.57 | 0.56 | 0.44 |
| TECR | #NA | #NA | #NA | wt | 38°C | 1.00 | 1.00 | 1.00 | 0.00 |
| TECR | #NA | #NA | #NA | GFP | 38°C | 0.30 | 0.26 | 0.28 | 1.00 |
| TECR | 182 | P | L | DM | 38°C | 0.31 | 0.29 | 0.30 | 0.97 |
| TECR | 79 | R | W | NV | 38°C | 1.06 | 1.03 | 1.05 | -0.06 |
| TECR | 50 | L | I | NV | 38°C | 1.11 | 1.07 | 1.09 | -0.12 |
| TPK1 | #NA | #NA | #NA | wt | 38°C | 1.00 | 1.00 | 1.00 | 0.00 |
| TPK1 | #NA | #NA | #NA | GFP | 38°C | 0.00 | 0.00 | 0.00 | 1.00 |
| TPK1 | 219 | N | S | DM | 38°C | 0.70 | 0.80 | 0.75 | 0.25 |
| TPK1 | 50 | N | H | DM | 38°C | 0.84 | 0.89 | 0.87 | 0.13 |
| TPK1 | 223 | G | R | DM? | 38°C | 0.75 | 0.68 | 0.72 | 0.28 |
| TPK1 | 40 | L | P | DM | 38°C | 0.71 | 0.67 | 0.69 | 0.31 |
| TPK1 | 57 | E | K | NV | 38°C | 0.66 | 0.70 | 0.68 | 0.32 |
| UBE2I | #NA | #NA | #NA | wt | 38°C | 1.00 | 1.00 | 1.00 | 0.00 |
| UBE2I | #NA | #NA | #NA | GFP | 38°C | 0.67 | 0.66 | 0.66 | 1.00 |
| UBE2I | 25 | V | M | DFP | 38°C | 1.06 | 0.97 | 1.02 | -0.05 |
| UBE2I | 58 | F | C | NV | 38°C | 0.67 | 0.53 | 0.60 | 1.19 |
| UROS | #NA | #NA | #NA | wt | 38°C | 1.00 | 1.00 | 1.00 | 0.00 |
| UROS | #NA | #NA | #NA | GFP | 38°C | 0.53 | 0.58 | 0.55 | 1.00 |
| UROS | 69 | A | T | DM | 38°C | 1.14 | 1.11 | 1.12 | 0.48 |
| UROS | 188 | G | R | DM | 38°C | 1.18 | 1.19 | 1.19 | 0.75 |
| UROS | 237 | L | P | DM | 38°C | 1.13 | 1.19 | 1.16 | 0.63 |
| UROS | 53 | P | L | DM | 38°C | 1.20 | 1.23 | 1.22 | 0.86 |
| UROS | 3 | V | F | DM | 38°C | 1.21 | 1.37 | 1.29 | 1.16 |
| UROS | 104 | A | V | DM | 38°C | 1.20 | 1.22 | 1.21 | 0.85 |
| UROS | 173 | H | Y | DM | 38°C | 1.18 | 1.23 | 1.21 | 0.82 |
| UROS | 188 | G | W | DM | 38°C | 1.26 | 1.24 | 1.25 | 1.00 |
| UROS | 228 | T | M | DM | 38°C | 0.90 | 1.26 | 1.08 | 0.33 |
| UROS | 212 | S | P | DM | 38°C | 1.06 | 1.11 | 1.09 | 0.34 |
| UROS | 219 | I | S | DM | 38°C | 1.22 | 1.21 | 1.22 | 0.87 |
| UROS | 187 | Q | P | DM | 38°C | 1.26 | 1.26 | 1.26 | 1.05 |
| UROS | 225 | G | S | DM | 38°C | 1.07 | 0.95 | 1.01 | 0.03 |
| UROS | 47 | S | P | DM | 38°C | 1.23 | 1.27 | 1.25 | 1.00 |
| UROS | 66 | A | V | DM | 38°C | 1.34 | 1.26 | 1.30 | 1.20 |
| UROS | 236 | G | V | DM | 38°C | 1.15 | 1.22 | 1.19 | 0.75 |
| UROS | 58 | G | R | DM | 38°C | 1.16 | 1.17 | 1.16 | 0.65 |
| UROS | 99 | V | A | DM | 38°C | 1.18 | 1.21 | 1.19 | 0.77 |
| UROS | 62 | T | A | DM | 38°C | 1.17 | 1.19 | 1.18 | 0.72 |
| UROS | 4 | L | F | DM | 38°C | 1.25 | 1.24 | 1.24 | 0.97 |
| UROS | 57 | G | R | NV | 38°C | 1.19 | 1.12 | 1.15 | 0.61 |
| UROS | 103 | T | A | NV | 38°C | 1.25 | 1.32 | 1.28 | 1.14 |
| UROS | 171 | V | G | NV | 38°C | 1.07 | 1.00 | 1.03 | 0.14 |
| UROS | 222 | A | V | NV | 38°C | 1.18 | 1.11 | 1.14 | 0.57 |
| UROS | 165 | I | V | NV | 38°C | 1.03 | 1.04 | 1.04 | 0.14 |
| UROS | 113 | D | V | NV | 38°C | 0.90 | 0.88 | 0.89 | -0.43 |
| UROS | 261 | P | A | NV | 38°C | 0.97 | 0.95 | 0.96 | -0.15 |
| UROS | 206 | K | E | NV | 38°C | 1.05 | 1.03 | 1.04 | 0.17 |
| UROS | 234 | A | T | NV | 38°C | 0.98 | 0.93 | 0.96 | -0.18 |
| UROS | 247 | T | M | NV | 38°C | 1.13 | 1.13 | 1.13 | 0.51 |
| UROS | 263 | G | S | NV | 38°C | 0.95 | 1.03 | 0.99 | -0.03 |
| UROS | 264 | C | F | NV | 38°C | 1.04 | 1.05 | 1.04 | 0.18 |
| UROS | 124 | K | R | NV | 38°C | 0.84 | 0.83 | 0.84 | -0.66 |
| UROS | 36 | L | V | NV | 38°C | 0.98 | 0.97 | 0.98 | -0.08 |
| YARS | #NA | #NA | #NA | wt | 38°C | 1.00 | 1.00 | 1.00 | 0.00 |
| YARS | #NA | #NA | #NA | GFP | 38°C | 0.50 | 0.57 | 0.54 | 1.00 |
| YARS | 41 | G | R | DM | 38°C | 0.00 | 0.00 | 0.00 | 2.15 |
| YARS | 196 | E | K | DM | 38°C | 0.67 | 0.60 | 0.64 | 0.78 |
| YARS | 431 | M | L | NV | 38°C | 0.93 | 0.94 | 0.94 | 0.14 |
| YARS | 339 | A | T | NV | 38°C | 1.14 | 1.10 | 1.12 | -0.26 |
| Gene | aa pos | wt | mut | annotation | temperature | relative growth rate | | | FCT score |
| measurement 1 | measurement 2 | average |
| CALM1 | #NA | #NA | #NA | wt | 38°C | 1.00 | 1.00 | 1.00 | 0.00 |
| CALM1 | #NA | #NA | #NA | GFP | 38°C | 0.00 | 0.00 | 0.00 | 1.00 |
| CALM1 | 98 | N | S | DM | 38°C | 0.26 | 0.18 | 0.22 | 0.78 |
| CALM1 | 53 | I | N | DM | 38°C | 0.87 | 0.94 | 0.90 | 0.10 |
| CALM1 | 90 | F | L | DM | 38°C | 0.64 | 0.79 | 0.71 | 0.29 |
| CALM1 | 130 | D | G | DM | 38°C | 0.78 | 0.81 | 0.80 | 0.20 |
| CALM1 | 142 | F | L | DM | 38°C | 0.69 | 0.74 | 0.72 | 0.28 |
| CALM1 | 42 | Q | L | NV | 38°C | 1.01 | 0.95 | 0.98 | 0.02 |
| CALM1 | 50 | Q | R | NV | 38°C | 0.95 | 1.00 | 0.98 | 0.02 |
| CMPK1 | #NA | #NA | #NA | wt | 38°C | 1.00 | 1.00 | 1.00 | 0.00 |
| CMPK1 | #NA | #NA | #NA | GFP | 38°C | 0.43 | 0.42 | 0.42 | 1.00 |
| CMPK1 | 115 | N | S | DM | 38°C | 0.94 | 0.91 | 0.93 | 0.13 |
| CMPK1 | 107 | E | K | NV | 38°C | 0.93 | 0.91 | 0.92 | 0.14 |
| DHDDS | #NA | #NA | #NA | wt | 38°C | 1.00 | 1.00 | 1.00 | 0.00 |
| DHDDS | #NA | #NA | #NA | GFP | 38°C | 0.37 | 0.40 | 0.38 | 1.00 |
| DHDDS | 42 | K | E | DM | 38°C | 1.02 | 1.01 | 1.01 | -0.02 |
| DHFR | #NA | #NA | #NA | wt | 38°C | 1.00 | 1.00 | 1.00 | 0.00 |
| DHFR | #NA | #NA | #NA | GFP | 38°C | 0.39 | 0.37 | 0.38 | 1.00 |
| DHFR | 80 | L | F | DM | 38°C | 1.01 | 0.89 | 0.95 | 0.09 |
| DHFR | 153 | D | V | DM | 38°C | 0.46 | 0.43 | 0.44 | 0.90 |
| DHFR | 63 | E | Q | NV | 38°C | 0.82 | 0.89 | 0.85 | 0.23 |
| DPAGT1 | #NA | #NA | #NA | wt | 38°C | 1.00 | 1.00 | 1.00 | 0.00 |
| DPAGT1 | #NA | #NA | #NA | GFP | 38°C | 0.41 | 0.39 | 0.40 | 1.00 |
| DPAGT1 | 170 | Y | C | DM | 38°C | 0.94 | 0.95 | 0.94 | 0.10 |
| DPAGT1 | 69 | I | N | DM | 38°C | 0.93 | 0.98 | 0.96 | 0.07 |
| DPAGT1 | 108 | M | I | DM | 38°C | 1.03 | 1.00 | 1.02 | -0.03 |
| DPAGT1 | 29 | I | F | DM | 38°C | 0.65 | 0.69 | 0.67 | 0.54 |
| DPAGT1 | 297 | I | F | DM | 38°C | 0.75 | 0.88 | 0.81 | 0.31 |
| DPAGT1 | 301 | R | H | DM | 38°C | 0.81 | 0.88 | 0.84 | 0.26 |
| DPAGT1 | 385 | L | R | DM | 38°C | 0.93 | 1.03 | 0.98 | 0.04 |
| DPAGT1 | 114 | A | G | DM | 38°C | 0.96 | 1.00 | 0.98 | 0.03 |
| DPAGT1 | 160 | G | S | DM | 38°C | 0.79 | 0.94 | 0.86 | 0.23 |
| DPAGT1 | 137 | L | F | NV | 38°C | 0.99 | 0.94 | 0.96 | 0.06 |
| DPAGT1 | 37 | I | L | NV | 38°C | 0.96 | 1.01 | 0.98 | 0.03 |
| DPAGT1 | 393 | I | V | NV | 38°C | 1.05 | 1.06 | 1.05 | -0.09 |
| DPAGT1 | 371 | L | F | NV | 38°C | 0.84 | 0.90 | 0.87 | 0.21 |
| EMG1 | #NA | #NA | #NA | wt | 38°C | 1.00 | 1.00 | 1.00 | 0.00 |
| EMG1 | #NA | #NA | #NA | GFP | 38°C | 0.83 | 0.75 | 0.79 | 1.00 |
| EMG1 | 86 | D | G | DM | 38°C | 0.73 | 0.83 | 0.78 | 1.04 |
| EMG1 | 214 | E | G | NV | 38°C | 0.98 | 1.05 | 1.02 | -0.08 |
| FTFD1 | #NA | #NA | #NA | wt | 38°C | 1.00 | 1.00 | 1.00 | 0.00 |
| FTFD1 | #NA | #NA | #NA | GFP | 38°C | 0.39 | 0.37 | 0.38 | 1.00 |
| FTFD1 | 45 | K | R | FP | 38°C | 1.22 | 0.96 | 1.09 | -0.14 |
| FTFD1 | 356 | S | C | NV | 38°C | 1.17 | 1.08 | 1.13 | -0.21 |
| GDI1 | #NA | #NA | #NA | wt | 38°C | 1.00 | 1.00 | 1.00 | 0.00 |
| GDI1 | #NA | #NA | #NA | GFP | 38°C | 0.11 | 0.13 | 0.12 | 1.00 |
| GDI1 | 92 | L | P | DM | 38°C | 0.24 | 0.20 | 0.22 | 0.89 |
| GDI1 | 423 | R | P | DM | 38°C | 0.36 | 0.36 | 0.36 | 0.73 |
| GDI1 | 63 | P | S | NV | 38°C | 1.05 | 1.07 | 1.06 | -0.07 |
| GDI1 | 256 | D | Y | NV | 38°C | 0.54 | 0.51 | 0.53 | 0.54 |
| GFPT2 | #NA | #NA | #NA | wt | 38°C | 1.00 | 1.00 | 1.00 | 0.00 |
| GFPT2 | #NA | #NA | #NA | GFP | 38°C | 0.61 | 0.59 | 0.60 | 1.00 |
| GFPT2 | 471 | I | V | DP | 38°C | 0.98 | 1.00 | 0.99 | 0.03 |
| GFPT2 | 430 | T | I | NV | 38°C | 1.06 | 1.02 | 1.04 | -0.09 |
| GLUL | #NA | #NA | #NA | wt | 38°C | 1.00 | 1.00 | 1.00 | 0.00 |
| GLUL | #NA | #NA | #NA | GFP | 38°C | 0.22 | 0.21 | 0.22 | 1.00 |
| GLUL | 324 | R | C | DM | 38°C | 0.66 | 0.65 | 0.65 | 0.44 |
| GLUL | 341 | R | C | DM | 38°C | 0.19 | 0.22 | 0.20 | 1.02 |
| GLUL | 80 | V | M | NV | 38°C | 1.04 | 0.96 | 1.00 | 0.00 |
| NCS1 | #NA | #NA | #NA | wt | 38°C | 1.00 | 1.00 | 1.00 | 0.00 |
| NCS1 | #NA | #NA | #NA | GFP | 38°C | 0.38 | 0.56 | 0.47 | 1.00 |
| NCS1 | 102 | R | Q | DM | 38°C | 1.05 | 1.48 | 1.26 | -0.50 |
| NCS1 | 79 | R | Q | NV | 38°C | 1.07 | 1.00 | 1.04 | -0.07 |
| NHP2 | #NA | #NA | #NA | wt | 38°C | 1.00 | 1.00 | 1.00 | 0.00 |
| NHP2 | #NA | #NA | #NA | GFP | 38°C | 0.38 | 0.41 | 0.39 | 1.00 |
| NHP2 | 126 | V | M | DM | 38°C | 0.69 | 0.78 | 0.73 | 0.44 |
| NHP2 | 139 | Y | H | DM | 38°C | 0.65 | 0.75 | 0.70 | 0.49 |
| NHP2 | 118 | A | T | NV | 38°C | 0.97 | 0.97 | 0.97 | 0.05 |
| NHP2 | 101 | R | Q | NV | 38°C | 0.98 | 1.03 | 1.00 | -0.01 |
| NSDHL | #NA | #NA | #NA | wt | 36°C | 1.00 | 1.00 | 1.00 | 0.00 |
| NSDHL | #NA | #NA | #NA | GFP | 36°C | 0.96 | 0.58 | 0.77 | 1.00 |
| NSDHL | 105 | A | V | DM | 36°C | 0.87 | 0.87 | 0.87 | 0.59 |
| NSDHL | 205 | G | S | DM | 36°C | 0.90 | 0.67 | 0.79 | 0.94 |
| NSDHL | 340 | C | R | DM | 36°C | 0.87 | 0.52 | 0.70 | 1.34 |
| NSDHL | 147 | S | R | DM | 36°C | 0.92 | 0.54 | 0.73 | 1.20 |
| NSDHL | 349 | Y | H | DM | 36°C | 0.88 | 0.53 | 0.70 | 1.30 |
| NSDHL | 182 | A | P | DM | 36°C | 0.62 | 0.49 | 0.55 | 1.97 |
| NSDHL | 349 | Y | C | DM | 36°C | 0.70 | 0.55 | 0.63 | 1.64 |
| NSDHL | 132 | C | W | DM | 36°C | 1.01 | 0.61 | 0.81 | 0.84 |
| NSDHL | 124 | G | S | DM | 36°C | 0.77 | 0.65 | 0.71 | 1.29 |
| NSDHL | 9 | M | V | NV | 36°C | 1.00 | 0.84 | 0.92 | 0.35 |
| NSDHL | 95 | L | V | NV | 36°C | 1.12 | 0.86 | 0.99 | 0.04 |
| NSDHL | 298 | W | L | NV | 36°C | 1.27 | 1.10 | 1.19 | -0.82 |
| NSDHL | 281 | R | C | NV | 36°C | 1.12 | 1.01 | 1.06 | -0.28 |
| PGK1 | #NA | #NA | #NA | wt | 36°C | 1.00 | 1.00 | 1.00 | 0.00 |
| PGK1 | #NA | #NA | #NA | GFP | 36°C | 0.22 | 0.22 | 0.22 | 1.00 |
| PGK1 | 268 | D | N | DM | 36°C | 0.55 | 0.81 | 0.68 | 0.41 |
| PGK1 | 316 | C | R | DM | 36°C | 0.54 | 0.50 | 0.52 | 0.62 |
| PGK1 | 89 | L | P | DM | 36°C | 0.78 | 0.51 | 0.64 | 0.46 |
| PGK1 | 206 | R | P | DM | 36°C | 1.08 | 1.11 | 1.10 | -0.12 |
| PGK1 | 320 | S | N | DM | 36°C | 0.54 | 0.49 | 0.51 | 0.62 |
| PGK1 | 354 | A | P | DM | 36°C | 1.10 | 0.95 | 1.02 | -0.03 |
| PGK1 | 371 | I | K | DM | 36°C | 0.38 | 0.46 | 0.42 | 0.74 |
| PGK1 | 47 | I | N | DM | 36°C | 0.30 | 0.50 | 0.40 | 0.77 |
| PGK1 | 253 | I | T | DM | 36°C | 1.01 | 0.94 | 0.97 | 0.03 |
| PGK1 | 378 | T | P | DM | 36°C | 0.52 | 0.57 | 0.55 | 0.58 |
| PGK1 | 285 | D | V | DM | 36°C | 0.35 | 0.22 | 0.29 | 0.91 |
| PGK1 | 164 | D | V | DM | 36°C | 0.31 | 0.34 | 0.33 | 0.87 |
| PGK1 | 315 | D | N | DM | 36°C | 0.54 | 0.60 | 0.57 | 0.56 |
| PGK1 | 158 | G | V | DM | 36°C | 0.43 | 0.58 | 0.51 | 0.63 |
| PGK1 | 119 | L | P | NV | 36°C | 1.06 | 1.04 | 1.05 | -0.06 |
| PGK1 | 163 | N | S | NV | 36°C | 0.78 | 1.06 | 0.92 | 0.10 |
| PGK1 | 350 | R | W | NV | 36°C | 1.04 | 0.91 | 0.98 | 0.03 |
| PGK1 | 398 | A | T | NV | 36°C | 0.94 | 1.07 | 1.01 | -0.01 |
| PGK1 | 57 | S | L | NV | 36°C | 0.90 | 1.02 | 0.96 | 0.06 |
| PGK1 | 305 | S | C | NV | 36°C | 0.93 | 0.95 | 0.94 | 0.07 |
| PIN1 | #NA | #NA | #NA | wt | 38°C | 1.00 | 1.00 | 1.00 | 0.00 |
| PIN1 | #NA | #NA | #NA | GFP | 38°C | 0.65 | 0.71 | 0.68 | 1.00 |
| PIN1 | 32 | S | C | DM | 38°C | 0.80 | 0.44 | 0.62 | 1.19 |
| PIN1 | 142 | R | Q | NV | 38°C | 0.97 | 0.98 | 0.97 | 0.09 |
| PKLR | #NA | #NA | #NA | wt | 38°C | 1.00 | 1.00 | 1.00 | #NA |
| PKLR | #NA | #NA | #NA | GFP | 38°C | 0.96 | 0.98 | 0.97 | #NA |
| PKLR | 407 | E | G | DM | 38°C | 1.00 | 1.02 | 1.01 | #NA |
| PKLR | 486 | R | L | DM | 38°C | 0.90 | 0.92 | 0.91 | #NA |
| PKLR | 107 | M | T | DM | 38°C | 0.88 | 0.86 | 0.87 | #NA |
| PKLR | 163 | R | C | DM | 38°C | 0.86 | 0.81 | 0.83 | #NA |
| PKLR | 406 | G | R | DM | 38°C | 0.88 | 0.96 | 0.92 | #NA |
| PKLR | 410 | K | E | DM | 38°C | 0.98 | 0.98 | 0.98 | #NA |
| PKLR | 479 | R | C | DM | 38°C | 1.06 | 1.08 | 1.07 | #NA |
| PKLR | 426 | R | W | DM | 38°C | 0.74 | 0.67 | 0.70 | #NA |
| PKLR | 479 | R | H | DM | 38°C | 0.93 | 0.91 | 0.92 | #NA |
| PKLR | 163 | R | L | DM | 38°C | 0.83 | 0.81 | 0.82 | #NA |
| PKLR | 337 | R | Q | DM | 38°C | 0.85 | 0.81 | 0.83 | #NA |
| PKLR | 275 | G | R | DM | 38°C | 0.80 | 0.81 | 0.81 | #NA |
| PKLR | 331 | D | E | DM | 38°C | 0.89 | 0.92 | 0.90 | #NA |
| PKLR | 421 | Q | K | DM | 38°C | 0.95 | 0.99 | 0.97 | #NA |
| PKLR | 359 | R | C | DM | 38°C | 0.79 | 0.75 | 0.77 | #NA |
| PKLR | 468 | A | G | DM | 38°C | 0.99 | 1.04 | 1.01 | #NA |
| PKLR | 281 | D | N | DM | 38°C | 0.91 | 0.90 | 0.91 | #NA |
| PKLR | 341 | G | D | DM | 38°C | 0.92 | 0.89 | 0.90 | #NA |
| PKLR | 360 | C | Y | DM | 38°C | 0.87 | 0.80 | 0.83 | #NA |
| PKLR | 460 | V | M | DM | 38°C | 0.85 | 0.88 | 0.87 | #NA |
| PKLR | 569 | R | Q | NV | 38°C | 0.87 | 0.90 | 0.88 | #NA |
| PKLR | 277 | E | K | NV | 38°C | 0.87 | 0.92 | 0.90 | #NA |
| PKLR | 460 | V | A | NV | 38°C | 1.05 | 1.07 | 1.06 | #NA |
| RPIA | #NA | #NA | #NA | wt | 38°C | 1.00 | 1.00 | 1.00 | 0.00 |
| RPIA | #NA | #NA | #NA | GFP | 38°C | 0.00 | 0.00 | 0.00 | 1.00 |
| RPIA | 135 | A | V | DM | 38°C | 0.00 | 0.00 | 0.00 | 1.00 |
| RPIA | 192 | H | Y | NV | 38°C | 0.55 | 0.57 | 0.56 | 0.44 |
| TECR | #NA | #NA | #NA | wt | 38°C | 1.00 | 1.00 | 1.00 | 0.00 |
| TECR | #NA | #NA | #NA | GFP | 38°C | 0.30 | 0.26 | 0.28 | 1.00 |
| TECR | 182 | P | L | DM | 38°C | 0.31 | 0.29 | 0.30 | 0.97 |
| TECR | 79 | R | W | NV | 38°C | 1.06 | 1.03 | 1.05 | -0.06 |
| TECR | 50 | L | I | NV | 38°C | 1.11 | 1.07 | 1.09 | -0.12 |
| TPK1 | #NA | #NA | #NA | wt | 38°C | 1.00 | 1.00 | 1.00 | 0.00 |
| TPK1 | #NA | #NA | #NA | GFP | 38°C | 0.00 | 0.00 | 0.00 | 1.00 |
| TPK1 | 219 | N | S | DM | 38°C | 0.70 | 0.80 | 0.75 | 0.25 |
| TPK1 | 50 | N | H | DM | 38°C | 0.84 | 0.89 | 0.87 | 0.13 |
| TPK1 | 223 | G | R | DM? | 38°C | 0.75 | 0.68 | 0.72 | 0.28 |
| TPK1 | 40 | L | P | DM | 38°C | 0.71 | 0.67 | 0.69 | 0.31 |
| TPK1 | 57 | E | K | NV | 38°C | 0.66 | 0.70 | 0.68 | 0.32 |
| UBE2I | #NA | #NA | #NA | wt | 38°C | 1.00 | 1.00 | 1.00 | 0.00 |
| UBE2I | #NA | #NA | #NA | GFP | 38°C | 0.67 | 0.66 | 0.66 | 1.00 |
| UBE2I | 25 | V | M | DFP | 38°C | 1.06 | 0.97 | 1.02 | -0.05 |
| UBE2I | 58 | F | C | NV | 38°C | 0.67 | 0.53 | 0.60 | 1.19 |
| UROS | #NA | #NA | #NA | wt | 38°C | 1.00 | 1.00 | 1.00 | 0.00 |
| UROS | #NA | #NA | #NA | GFP | 38°C | 0.53 | 0.58 | 0.55 | 1.00 |
| UROS | 69 | A | T | DM | 38°C | 1.14 | 1.11 | 1.12 | 0.48 |
| UROS | 188 | G | R | DM | 38°C | 1.18 | 1.19 | 1.19 | 0.75 |
| UROS | 237 | L | P | DM | 38°C | 1.13 | 1.19 | 1.16 | 0.63 |
| UROS | 53 | P | L | DM | 38°C | 1.20 | 1.23 | 1.22 | 0.86 |
| UROS | 3 | V | F | DM | 38°C | 1.21 | 1.37 | 1.29 | 1.16 |
| UROS | 104 | A | V | DM | 38°C | 1.20 | 1.22 | 1.21 | 0.85 |
| UROS | 173 | H | Y | DM | 38°C | 1.18 | 1.23 | 1.21 | 0.82 |
| UROS | 188 | G | W | DM | 38°C | 1.26 | 1.24 | 1.25 | 1.00 |
| UROS | 228 | T | M | DM | 38°C | 0.90 | 1.26 | 1.08 | 0.33 |
| UROS | 212 | S | P | DM | 38°C | 1.06 | 1.11 | 1.09 | 0.34 |
| UROS | 219 | I | S | DM | 38°C | 1.22 | 1.21 | 1.22 | 0.87 |
| UROS | 187 | Q | P | DM | 38°C | 1.26 | 1.26 | 1.26 | 1.05 |
| UROS | 225 | G | S | DM | 38°C | 1.07 | 0.95 | 1.01 | 0.03 |
| UROS | 47 | S | P | DM | 38°C | 1.23 | 1.27 | 1.25 | 1.00 |
| UROS | 66 | A | V | DM | 38°C | 1.34 | 1.26 | 1.30 | 1.20 |
| UROS | 236 | G | V | DM | 38°C | 1.15 | 1.22 | 1.19 | 0.75 |
| UROS | 58 | G | R | DM | 38°C | 1.16 | 1.17 | 1.16 | 0.65 |
| UROS | 99 | V | A | DM | 38°C | 1.18 | 1.21 | 1.19 | 0.77 |
| UROS | 62 | T | A | DM | 38°C | 1.17 | 1.19 | 1.18 | 0.72 |
| UROS | 4 | L | F | DM | 38°C | 1.25 | 1.24 | 1.24 | 0.97 |
| UROS | 57 | G | R | NV | 38°C | 1.19 | 1.12 | 1.15 | 0.61 |
| UROS | 103 | T | A | NV | 38°C | 1.25 | 1.32 | 1.28 | 1.14 |
| UROS | 171 | V | G | NV | 38°C | 1.07 | 1.00 | 1.03 | 0.14 |
| UROS | 222 | A | V | NV | 38°C | 1.18 | 1.11 | 1.14 | 0.57 |
| UROS | 165 | I | V | NV | 38°C | 1.03 | 1.04 | 1.04 | 0.14 |
| UROS | 113 | D | V | NV | 38°C | 0.90 | 0.88 | 0.89 | -0.43 |
| UROS | 261 | P | A | NV | 38°C | 0.97 | 0.95 | 0.96 | -0.15 |
| UROS | 206 | K | E | NV | 38°C | 1.05 | 1.03 | 1.04 | 0.17 |
| YARS | #NA | #NA | #NA | wt | 38°C | 1.00 | 1.00 | 1.00 | 0.00 |
| YARS | #NA | #NA | #NA | GFP | 38°C | 0.50 | 0.57 | 0.54 | 1.00 |
| YARS | 41 | G | R | DM | 38°C | 0.00 | 0.00 | 0.00 | 2.15 |
| YARS | 196 | E | K | DM | 38°C | 0.67 | 0.60 | 0.64 | 0.78 |
| YARS | 431 | M | L | NV | 38°C | 0.93 | 0.94 | 0.94 | 0.14 |
| YARS | 339 | A | T | NV | 38°C | 1.14 | 1.10 | 1.12 | -0.26 |

**Supplemental Table S5. Oligonucleotide primers.**

| **Deleting the GAL4 DNA-binding domain** | |
| --- | --- |
| ADH1HR_attR1_F | CTATACCAAGCATACAATCAACTCCAAGCTTGAAGCAAGCCTCCTGAAAGACAAGTTTGTACAAAAAAGCTGAAC |
| DBstartUp_R | CTTTCAGGAGGCTTGCTTCA |
| DBupstream_checkF | GAGCAACGGTATACGGCCTT |
| DBdownstream_checkR | CGCTAAGTTGGCAGCATCAC |
| SacIupstream_checkF | CCTTATACACAGCCAGTCTGCAG |
| SacIdownstream_checkR | GTAGACAAGCCGACAACCTTGA |
| **Replacing the LEU2 selection marker with the natMX4 selection marker** | |
| Leu_upstream_R | GTCGATATGCGGTGTGAAATAC |
| Leu_downstream_F | TGGTGCACTCTCAGTACAATCTG |
| Homology_Nat_F | CGGTATTTTCTCCTTACGCATCTGTGCGGTATTTCACACCGCATATCGACACTGGATGGCGGCGTTAGTAT |
| Homology_Nat_R | GGCTGGCTTAACTATGCGGCATCAGAGCAGATTGTACTGAGAGTGCACCAGCCAGATCTGTTTAGCTTGCCT |
| CmR_F | CCACCGTTGATATATCCCAATG |
| CmR_R | CAACTGACTGAAATGCCTCAAA |
| PUCori_F | ACAGCGTGAGCTATGAGAAAGC |
| PUCori_R | GGATACCTGTCCGCCTTTCT |
| **Site-directed mutagenesis (All primers used for site-directed mutagenesis was 5’ phosphorylated. )** | |
| CALM1[D130G]F | /5Phos/TCAGAGAAGCAGGTATTGATGGAGA |
| CALM1[F142L]F | /5Phos/CTATGAAGAATTGGTACAGATGATG |
| CALM1[F90L]F | /5Phos/ATCCGTGAGGCACTCCGAGTCTTTG |
| CALM1[I53N]F | /5Phos/TGCAGGATATGAACAATGAAGTGGA |
| CALM1[N98S]F | /5Phos/ACAAGGATGGCAGTGGTTATATCAG |
| DHDDS[K42E]F | /5Phos/CGCTATGCCAAGGAGTGCCAGGTGG |
| DHFR[D153V]F | /5Phos/TTCCAGAAATTGTTTTGGAGAAATA |
| DHFR[L80F]F | /5Phos/CTCAGCAGAGAATTCAAGGAACCTC |
| DHFR[M140L]F | /5Phos/GTGACAAGGATCCTGCAAGACTTTG |
| DHFR[M140L]R | /5Phos/AAATAGTTTAAGATGGCCTGGGTG |
| DPAGT1[A114G]F | /5Phos/TCCTGGGCTTTGGGGATGATGTACT |
| DPAGT1[G160S]F | /5Phos/CGCCCGATACTTAGCCTGCATCTGG |
| DPAGT1[I297F]F | /5Phos/CTCCTGCATATCTTCCCCTGCCCTC |
| DPAGT1[I29F]F | /5Phos/ACAGTCACCCTCTTCCCGGCCTTCC |
| DPAGT1[I69N]F | /5Phos/TTTTCCTTATCAACCTCTTCTGCTT |
| DPAGT1[L385R]F | /5Phos/TGCTCCTGCTGCGGCTGCAGATCCT |
| DPAGT1[M108I]F | /5Phos/CATCTGCTGCATCATCTTCCTGGGC |
| DPAGT1[R301H]F | /5Phos/TCCCCTGCCCTCACCACCGCATACC |
| EMG1[D86G]F | /5Phos/AAGCGCGGCCAGGTATCACCCACCA |
| NCS1[R102Q]F | /5Phos/ATGAGAAGCTACAGTGGGCCTTCAA |
| NSDHL[A182P]F | /5Phos/TTACAGGAGAGGCCAGTTCTGGGCG |
| NSDHL[C132W]F | /5Phos/CATTGAAACTTGGAAAGAGGCTGGG |
| NSDHL[G124S]F | /5Phos/GTGAATTACATTAGCACCAAGAATG |
| NSDHL[S147R]F | /5Phos/CAGCAGTGCCAGAGTCATCTTTGAG |
| NSDHL[Y349C]F | /5Phos/AGGCCATGGGCTGCCAGCCACTAGT |
| NSDHL[Y349H]F | /5Phos/AAGGCCATGGGCCACCAGCCACTAG |
| PGK1[A354P]F | /5Phos/CGGGGAACCAAACCTCTCATGGATG |
| PGK1[D164V]F | /5Phos/TCTATGTCAATGTTGCTTTTGGCAC |
| PGK1[D285V]F | /5Phos/CCTTGCCTGTTGTCTTTGTCACTGC |
| PGK1[D315N]F | /5Phos/TGGATGGGCTTGAACTGTGGTCCTG |
| PGK1[G158V]F | /5Phos/TTTCCAAGCTAGTGGATGTCTATGT |
| PGK1[I253T]F | /5Phos/ACAACATGGAGACTGGCACTTCTCT |
| PGK1[I371K]F | /5Phos/GCATCACCATCAAAGGTGGTGGAGA |
| PGK1[I47N]F | /5Phos/CTGTCCCAAGCAACAAATTCTGCTT |
| PGK1[S320N]F | /5Phos/GTGGTCCTGAAAACAGCAAGAAGTA |
| PGK1[T378P]F | /5Phos/GGAGACACTGCCCCTTGCTGTGCCA |
| PIN1[S32C]F | /5Phos/ATCACTAACGCCTGCCAGTGGGAGC |
| PKLR[A468G]F | /5Phos/TCAAGTGCTGTGGTGCTGCCATCAT |
| PKLR[C360Y]F | /5Phos/TGATTGGGCGCTACAACTTGGCGGG |
| PKLR[D281N]F | /5Phos/GAGCATGGGGTGAACATCGTCTTTG |
| PKLR[D331E]F | /5Phos/GGAGGTGAGCGAAGGCATCATGGTG |
| PKLR[G275R]F | /5Phos/GACCTGCGCTTCCGGGTGGAGCATG |
| PKLR[G341D]F | /5Phos/GGGGGGACCTAGACATCGAGATCCC |
| PKLR[G406R]F | /5Phos/ATCATGCTGTCAAGGGAGACTGCCA |
| PKLR[K410E]F | /5Phos/GGGGAGACTGCCGAGGGCAACTTCC |
| PKLR[Q421K]F | /5Phos/GCGGTGAAGATGAAGCATGCGATTG |
| PKLR[R163L]F | /5Phos/GACCGGAGATCCTCACTGGGATCCT |
| PKLR[R337Q]F | /5Phos/TCATGGTGGCACAGGGGGACCTAGG |
| PKLR[R359C]F | /5Phos/ATGATGATTGGGTGCTGCAACTTGG |
| PKLR[R426W]F | /5Phos/CATGCGATTGCCTGGGAGGCAGAGG |
| PKLR[R479C]F | /5Phos/ACCACAACTGGCTGCTCAGCCCAGC |
| PKLR[R479H]F | /5Phos/CCACAACTGGCCACTCAGCCCAGCT |
| PKLR[V460M]F | /5Phos/GCCATTGGTGCTATGGAGGCTGCCT |
| TECR[P182L]F | /5Phos/ACATCAATCACCTTCTCTACACTCC |
| TPK1[G223R]F | /5Phos/AATACCTACGACAGGTCTGGTGTTG |
| TPK1[L40P]F | /5Phos/GGAACAAAGCTCCTTTAAGAGCCTG |
| TPK1[N219S]F | /5Phos/TCAGTACTTCCAGTACCTACGACGG |
| TPK1[N50H]F | /5Phos/GATGGAGGTGCCCACCGCTTATATG |
| UBE2I[V25M]F | /5Phos/CCATTTGGTTTCATGGCTGTCCCAA |
| UROS[A66V]F | /5Phos/CCAGCCCCAGAGTAGTGGAAGCAGC |
| UROS[G225S]F | /5Phos/TTTGCAGCCATCAGCCCCACTACGG |
| UROS[G236V]F | /5Phos/TGGCCGCCCAGGTCCTTCCTGTAAG |
| UROS[G58R]F | /5Phos/GAAGATTACGGGAGACTCATTTTTA |
| UROS[I219S]F | /5Phos/ATATCGATCAAAGTAAGTTTGCAGC |
| UROS[L4F]F | /5Phos/ggcATGAAGGTTTTTTTACTGAAGG |
| UROS[Q187P]F | /5Phos/ACTATTCCCAGCCGGGGGTTCCAGC |
| UROS[S212P]F | /5Phos/ATTCAGGAGTTACCTGGTGACAATA |
| UROS[S47P]F | /5Phos/CTTCCCAGTTTCCCTGAGAAGCTTT |
| UROS[T62A]F | /5Phos/GGACTCATTTTTGCCAGCCCCAGAG |
| UROS[V99A]F | /5Phos/CAGTGTATGTGGCTGGAAATGCTAC |
| CALM1[D130G]R | /5Phos/TCATTTCATCTACTTCTTCATCTGTTAGTT |
| CALM1[F142L]R | /5Phos/TTGACTTGTCCGTCTCCATCA |
| CALM1[F90L]R | /5Phos/TTCTTCTTCACTATCTGTATCTTTCATTTT |
| CALM1[I53N]R | /5Phos/ATTCAGCTTCTGTTGGGTTCTG |
| CALM1[N98S]R | /5Phos/CAAAGACTCGGAATGCCTCAC |
| DHDDS[K42E]R | /5Phos/ACGGTTCCCGTCCATTATGAA |
| DHFR[D153V]R | /5Phos/AAAACGTGTCACTTTCAAAGTCTTG |
| DHFR[L80F]R | /5Phos/AACTAAATTAATTCTACCCTTTAAAGGTCG |
| DPAGT1[A114G]R | /5Phos/AGATCATGCAGCAGATGGCA |
| DPAGT1[G160S]R | /5Phos/GAAGGGCTTGGGCACCAC |
| DPAGT1[I297F]R | /5Phos/CTGAGGCAGTGAGTAGAGGAAGTT |
| DPAGT1[I29F]R | /5Phos/GGCCACAAATCCCAGCAG |
| DPAGT1[I69N]R | /5Phos/CAGCACCGCTGATCACTCC |
| DPAGT1[L385R]R | /5Phos/ATGTGAGGTTTCTCTCATGTATGGG |
| DPAGT1[M108I]R | /5Phos/GCAAGGAGGGCACCTATCAG |
| DPAGT1[R301H]R | /5Phos/TGATATGCAGGAGCTGAGGCA |
| EMG1[D86G]R | /5Phos/CCCCAGGGTCCCGTCC |
| NCS1[R102Q]R | /5Phos/CCAGGGTTCCCCGTGAG |
| NSDHL[A182P]R | /5Phos/GATCTTAGTCTCTGTGTAGTAGTCAATGGG |
| NSDHL[C132W]R | /5Phos/ACATTCTTGGTGCCAATGTAATTC |
| NSDHL[G124S]R | /5Phos/TCTATAAAAGAGCTCCTTGTTGTTACTGG |
| NSDHL[S147R]R | /5Phos/GTTAAAATGAGTTTCTGAACCCCAG |
| NSDHL[Y349C]R | /5Phos/TTTTGGCTCTCTCGCAGCTG |
| NSDHL[Y349H]R | /5Phos/TTTGGCTCTCTCGCAGCTGT |
| PGK1[A354P]R | /5Phos/GGCAAAAGCTTCCCATTCAA |
| PGK1[D164V]R | /5Phos/CATCCCCTAGCTTGGAAAGTG |
| PGK1[D285V]R | /5Phos/TAATCTTCACACCATTCTTCTCAGCT |
| PGK1[D315N]R | /5Phos/GCCAGCAGGTATGCCAGAAG |
| PGK1[G158V]R | /5Phos/GTGAAGCTCGGAAAGCTTCTATTTT |
| PGK1[I253T]R | /5Phos/TGAGCACCTTAAGGAAGGTAAAAG |
| PGK1[I371K]R | /5Phos/AGCCCCTAGAAGTGGCTTTCA |
| PGK1[I47N]R | /5Phos/CAGCCTTAATCCTCTGGTTGTTT |
| PGK1[S320N]R | /5Phos/AGTCCAAGCCCATCCAGCC |
| PGK1[T378P]R | /5Phos/ACCACCTATGATGGTGATGCA |
| PIN1[S32C]R | /5Phos/GTGGTTGAAGTAGTACACTCGGC |
| PKLR[A468G]R | /5Phos/AGGCAGCCTCCACAGCAC |
| PKLR[C360Y]R | /5Phos/TCATCTTCTGAGCCAGGAAAAC |
| PKLR[D281N]R | /5Phos/CACCCCGAAGCGCAGG |
| PKLR[D331E]R | /5Phos/AGGATTTCATCAAACCTCTTCACG |
| PKLR[G275R]R | /5Phos/TCGGACGTCCTGCTCGG |
| PKLR[G341D]R | /5Phos/GTGCCACCATGATGCCGT |
| PKLR[G406R]R | /5Phos/GCAGTCAGCCCCATCCAG |
| PKLR[K410E]R | /5Phos/TGACAGCATGATGCAGTCAGC |
| PKLR[Q421K]R | /5Phos/TTCCACAGGGAAGTTGCCCT |
| PKLR[R163L]R | /5Phos/CCTTGGTGTCCAGGGCG |
| PKLR[R337Q]R | /5Phos/TGCCGTCGCTCACCTCC |
| PKLR[R359C]R | /5Phos/CTTCTGAGCCAGGAAAACCTTC |
| PKLR[R426W]R | /5Phos/CTGCATCTTCACCGCTTCCA |
| PKLR[R479C]R | /5Phos/CAGCACAATGATGGCAGCAG |
| PKLR[R479H]R | /5Phos/TCAGCACAATGATGGCAGCA |
| PKLR[V460M]R | /5Phos/GGTGACCTCAGTGGGATCAC |
| TECR[P182L]R | /5Phos/AATAGGCCATCCACGCGG |
| TPK1[G223R]R | /5Phos/GGAAGTACTGACCAATGTTCCAAA |
| TPK1[L40P]R | /5Phos/AAAGATGACGAAAATAGTTGTCCAAAG |
| TPK1[N219S]R | /5Phos/CCAATGTTCCAAAAGCAAGC |
| TPK1[N50H]R | /5Phos/GGCACAGGCTCTTAAAAGAGCT |
| UBE2I[V25M]R | /5Phos/GTGGTCTTTCCTCCATGCTTT |
| UROS[A66V]R | /5Phos/TAAAAATGAGTCCCCCGTAATCTT |
| UROS[G225S]R | /5Phos/CTTAATTTGATCGATATTGTCACCAGATAA |
| UROS[G236V]R | /5Phos/GCGCGCGAGCCGTAGT |
| UROS[G58R]R | /5Phos/AGGATGAGAAAGCTTCTCAGAGAAAC |
| UROS[I219S]R | /5Phos/TGTCACCAGATAACTCCTGAATGT |
| UROS[L4F]R | /5Phos/aacttttttgtacaaagttggcattataaa |
| UROS[Q187P]R | /5Phos/AGCTGTTCAGGTTCCCTTGGA |
| UROS[S212P]R | /5Phos/GTGCTTGAGACTGTATGTGAGGC |
| UROS[S47P]R | /5Phos/AGACAAAAACTCAAACGATAAAACAGG |
| UROS[T62A]R | /5Phos/CCCGTAATCTTCAGGATGAGAAA |
| UROS[V99A]R | /5Phos/ACTTGGCATTCCATTTTTCTTTC |
| DPAGT1[I393V]F | /5Phos/CTGGGCAGTGCCGTCACCTTCTCCA |
| DPAGT1[I393V]R | /5Phos/GATCTGCAGCAGCAGCAGG |
| NHP2[A118T]F | /5Phos/CTGGGTGCAGCCACAGGCTCCAAGC |
| NHP2[A118T]R | /5Phos/GTCCGTCTTAGAGGGGATATAGACA |
| NHP2[R101Q]F | /5Phos/TGTGTGAGGACCAAAATTTGCCCTA |
| NHP2[R101Q]R | /5Phos/TGACTGGGAGATGGCAGTATACC |
| GDI1[P63S]F | /5Phos/CTGGAGGGGCCCTCTGAGTCGATGG |
| GDI1[P63S]R | /5Phos/CAACTGAAAACGCTTATACAGCTCC |
| GDI1[D256Y]F | /5Phos/AACAAACCTGTGTATGACATCATCA |
| GDI1[D256Y]R | /5Phos/CAGCATATATGTCCCCCCATAGA |
| GLUL[V80M]F | /5Phos/GACATGTATCTCATGCCTGCTGCCA |
| GLUL[V80M]R | /5Phos/ACTGTTGGAACCCTCAGACTGTAA |
| YARS[M431L]F | /5Phos/AAACCCCAGAAGTTGAGAGGAGTCG |
| YARS[M431L]R | /5Phos/CAGGTTGCACAGCACCACTA |
| YARS[A339T]F | /5Phos/AAACTGGCCAGCACTGCCTACCCAG |
| YARS[A339T]R | /5Phos/TTTCAGGGCAGGGGTATTAAACT |
| NSDHL[L95V]F | /5Phos/CTGTACCCAGCTGTGAAAGGTGTAA |
| NSDHL[L95V]R | /5Phos/ATCCTGTCGGCTGCAGAGG |
| NSDHL[W298L]F | /5Phos/ACATCCCCTACTTGGTGGCCTACTA |
| NSDHL[W298L]R | /5Phos/GGTACTTGGGGGCCTCATAAT |
| PGK1[L119P]F | /5Phos/CTGTCATCCTGCCGGAGAACCTCCG |
| PGK1[L119P]R | /5Phos/ACCCAGCAGCTGGGTTGG |
| PGK1[N163S]F | /5Phos/ATGTCTATGTCAGTGATGCTTTTGG |
| PGK1[N163S]R | /5Phos/CCCCTAGCTTGGAAAGTGAAG |
| PGK1[R350W]F | /5Phos/GAAGCTTTTGCCTGGGGAACCAAAG |
| PGK1[R350W]R | /5Phos/CCATTCAAATACCCCCACAGG |
| PGK1[A398T]F | /5Phos/ACTGGGGGTGGTACCAGTTTGGAGC |
| PGK1[A398T]R | /5Phos/GCTCACATGGCTGACTTTATCC |
| PKLR[R569Q]F | /5Phos/CCAACATCATGAAGGTGCTAAGCAT |
| PKLR[R569Q]R | /5Phos/TGTAGCCGGAGCCAGGTC |
| PKLR[E277K]F | /5Phos/CGCTTCGGGGTGAAGCATGGGGTGG |
| PKLR[E277K]R | /5Phos/CAGGTCTCGGACGTCCTGC |
| PKLR[V460A]F | /5Phos/CCATTGGTGCTGCGGAGGCTGCCTT |
| PKLR[V460A]R | /5Phos/CGGTGACCTCAGTGGGATCA |
| CALM1[Q42L]F | /5Phos/GGTCACTGGGTCTGAACCCAACAGA |
| CALM1[Q50R]F | /5Phos/AAGCTGAATTGCGGGATATGATCAA |
| DHFR[E63Q]F | /5Phos/TTCTCCATTCCTCAGAAGAATCGAC |
| DPAGT1[L137F]F | /5Phos/TCACTACCTCTCTTCATGGTCTATT |
| DPAGT1[I37L]F | /5Phos/CGGGGCCACTTCCTTGCTGCGCGCC |
| DPAGT1[I393V]F | /5Phos/CTGGGCAGTGCCGTCACCTTCTCCA |
| EMG1[E214G]F | /5Phos/TGGAGTATACAGGGAAGATGGTGTC |
| GFPT2[T430I]F | /5Phos/AGACCGCGGACATCCTCCTGGCGCT |
| NSDHL[R281C]F | /5Phos/ACATTCCTGTCTTGCATCCTGACAG |
| PGK1[L119P]F | /5Phos/CTGTCATCCTGCCGGAGAACCTCCG |
| PGK1[S57L]F | /5Phos/ATGGAGCCAAGTTGGTAGTCCTTAT |
| PGK1[A398T]F | /5Phos/ACTGGGGGTGGTACCAGTTTGGAGC |
| PGK1[S305C]F | /5Phos/CCACTGTGGCTTGTGGCATACCTGC |
| PIN1[R142Q]F | /5Phos/CGTTTGCGCTGCAGACGGGGGAGAT |
| PKLR[R359C]F | /5Phos/ATGATGATTGGGTGCTGCAACTTGG |
| PKLR[V460A]F | /5Phos/CCATTGGTGCTGCGGAGGCTGCCTT |
| PKLR[E277K]F | /5Phos/CGCTTCGGGGTGAAGCATGGGGTGG |
| TECR[R79W]F | /5Phos/ACACTGTACTTCTGGGACCTGGGGG |
| TECR[L50I]F | /5Phos/GCCCGCCAGTCCATCCGCCTGGACC |
| TPK1[E57K]F | /5Phos/TATGATATCACCAAAGGAGAGAGAG |
| UBE2I[F58C]F | /5Phos/AAGGAGGCTTGTGTAAACTACGGAT |
| UROS[G57R]F | /5Phos/CCTGAAGATTACAGGGGACTCATTT |
| UROS[T103A]F | /5Phos/GTTGGAAATGCTGCTGCTTCTCTAG |
| UROS[V171G]F | /5Phos/TGTATCAGACAGGTGCACACCCAGG |
| UROS[A222V]F | /5Phos/AAATTAAGTTTGTAGCCATCGGCCC |
| UROS[I165V]F | /5Phos/GCCATGGAAAGCGTAACTGTGTATC |
| UROS[D113V]F | /5Phos/AAATTGGCCTGGTTACAGAAGGAGA |
| UROS[P261A]F | /5Phos/AAGGCTCTCCAGGCCCATGGCTGCT |
| UROS[K206E]F | /5Phos/ACATACAGTCTCGAGCACATTCAGG |
| CALM1[Q42L]R | /5Phos/TCATGACAGTTCCAAGTTCCTTT |
| CALM1[Q50R]R | /5Phos/CTGTTGGGTTCTGACCCAGTG |
| DHFR[E63Q]R | /5Phos/CCAGGTCTTCTTACCCATAATCAC |
| DPAGT1[L137F]R | /5Phos/GGCAGCTGTAGGTAGCAGCA |
| DPAGT1[I37L]R | /5Phos/GAAGGCCGGGATGAGGGT |
| DPAGT1[I393V]R | /5Phos/GATCTGCAGCAGCAGCAGG |
| EMG1[E214G]R | /5Phos/CACTGACCTTGCCATGGGC |
| GFPT2[T430I]R | /5Phos/CGCCTGACTGGCTGATGAA |
| NSDHL[R281C]R | /5Phos/CCAGAAAGGGATGGGCTCAT |
| PGK1[L119P]R | /5Phos/ACCCAGCAGCTGGGTTGG |
| PGK1[S57L]R | /5Phos/TGTCCAAGCAGAATTTGATGC |
| PGK1[A398T]R | /5Phos/GCTCACATGGCTGACTTTATCCT |
| PGK1[S305C]R | /5Phos/CTTGGCCAGTCTTGGCATTCT |
| PIN1[R142Q]R | /5Phos/AGGCGTCTTCAAATGGCTTCT |
| PKLR[R359C]R | /5Phos/CTTCTGAGCCAGGAAAACCTTC |
| PKLR[V460A]R | /5Phos/CGGTGACCTCAGTGGGATCA |
| PKLR[E277K]R | /5Phos/CAGGTCTCGGACGTCCTGC |
| TECR[R79W]R | /5Phos/GGCCGTGGTGCCCAC |
| TECR[L50I]R | /5Phos/GGGGTACCACTGCGGATG |
| TPK1[E57K]R | /5Phos/TAAGCGGTTGGCACCTCCAT |
| UBE2I[F58C]R | /5Phos/CCCACGGAGTCCCTTTCTTT |
| UROS[G57R]R | /5Phos/ATGAGAAAGCTTCTCAGAGAAACTGG |
| UROS[T103A]R | /5Phos/CACATACACTGACTTGGCATTCC |
| UROS[V171G]R | /5Phos/CAGTTATGCTTTCCATGGCAAT |
| UROS[A222V]R | /5Phos/GATCGATATTGTCACCAGATAACTCC |
| UROS[I165V]R | /5Phos/AATCCCTTTGTCCTTGAGCGC |
| UROS[D113V]R | /5Phos/TACTCACTAGAGAAGCAGTAGCATTTCC |
| UROS[P261A]R | /5Phos/CCTGATGCCAGTGGCCAG |
| UROS[K206E]R | /5Phos/GAGGCCAGAGGGACTAAAAAATG |
| GLUL[T116I]F | /5Phos/ATTTGAGGCACATCTGTAAACGGAT |
| GLUL[T116I]R | /5Phos/TGGTCTCTGCAGGCCTTCG |
| NSDHL[A14V]F | /5Phos/GAGACCAAGTCGTACGGACTCATTT |
| NSDHL[A14V]R | /5Phos/TCATTGGCTCGCTAACTGCTG |
| NSDHL[Q253K]F | /5Phos/CTGGCGGCAGAGAAGCTCTCCCGAG |
| NSDHL[Q253K]R | /5Phos/GATGTGTCCATGGACCACGTT |
| NSDHL[Q89E]F | /5Phos/CTCTGCAGCCGAGAGGATCTGTACC |
| NSDHL[Q89E]R | /5Phos/GTCACCCAGAAAGAACCGCA |
| PKLR[V506I]F | /5Phos/GCTGCCCGCCAGATCCACTTATGCC |
| PKLR[V506I]R | /5Phos/CTGGGCAGAGCGGGTGA |
| PKLR[H306Q]F | /5Phos/TCCGGAAGGACAAGGCATCAAGATC |
| PKLR[H306Q]R | /5Phos/CCCAGAGCAGCCCTGACG |
| PKLR[R449C]F | /5Phos/GCGCCACTAAGCTGTGATCCCACTG |
| PKLR[R449C]R | /5Phos/TGCCCGACGTAGCTCCTCA |
| PKLR[R209Q]F | /5Phos/CCAATATTGTCCAGGTCGTGCCGGT |
| PKLR[R209Q]R | /5Phos/GGTAGTCCACCCACACGGTGT |
| PKLR[E538D]F | /5Phos/ATTTGGCATTGATAGTGGAAAGCTC |
| PKLR[E538D]R | /5Phos/TGCACCCGGCGATCTACA |
| PKLR[P303A]F | /5Phos/GCTGCTCTGGGTGCGGAAGGACACG |
| PKLR[P303A]R | /5Phos/CCTGACGGCAGCCACGT |
| UROS[G263S]F | /5Phos/CTCCAGCCCCATAGCTGCTGCTGCC |
| UROS[G263S]R | /5Phos/AGCCTTCCTGATGCCAGTGG |
| UROS[C264F]F | /5Phos/AGCCCCATGGCTTCTGCTGCCCAAC |
| UROS[C264F]R | /5Phos/GGAGAGCCTTCCTGATGCCA |

**Supplemental Table S6. Likelihood ratios corresponding to different thresholds on the functional complementation assay score.**

|  | FCS score threshold | | |
| --- | --- | --- | --- |
| 0.6 | 0.8 | 1 |
| Likelihood ratio L | 6.7 | 18.7 | 20.7 |
